# Supplementary material for: A Genome-Wide Identification and Analysis of the Basic Helix-Loop-Helix Transcription Factors in Brown Planthopper, Nilaparvata lugens
Source: Genes (Basel). 2016 Nov 18;7(11):100. doi: 10.3390/genes7110100 (PMC5126786; doi:10.3390/genes7110100)
Supplement: Supplementary file 2 [file genes-07-00100-s002.txt]

>NlAse1
AGACGTAACGAGAGAGAACGTAACCGTGTCAAACAAGTGAATCAAGGTTTCGCTCTACTTAGGAATCACATACCGTCATTGGCAAATACGAAAAAACTCTCCAAAGTTATCACCCTCAGAAGTGCAGTTGACTACATTCGAACACTGGAACGCCTTCTACATGATGATCACGGACTCGCGTACACAGAGAGTCAGGCTTCGACACCAGAGAGTACGACGTCTTCTTCCTGCTCTGTGGATCTTCAAATGTTCGCA
>NlAse2
ATGGGTGGAGGAAGATGTGCCGGTGGCTGGAGAGGCGCCACTAGTGGGGTGGTGGGGGGTGTCGCGTGCCGAGCGAGGCCACGCGCCGAGCGGCGCGCGCTGTCAGTGGAGGGGGCAGCTATAAAAAGGGCCGGAAACTGGCAGCGCGCGTCATTCGCACTCGAGATGGAGACACATGAGGTTCGTTGCAAGCGGAGAATCAGTTTCGCGTACGGCGGACAGCAGACGGCGTCGGTAGCGCGTCGCAACGCACGTGAGCGCAACCGCGTCAAACAGGTGAACAACGGATTCGCGACGCTACGGGCGCACATCCCCGTGTCGGTGACGGCGGCCCTTGGCGGACAAACCCAGCGGCCCGCACCCGGCAGTGCCGCCTCCAAGAAGCTCAGCAAAGTCGAGACCCTGAGGATGGCAGTCGAGTATATCCGCTCCCTCCAACAACTCCTCGACGGACAAGTCGTATCGCCCCCACCCTCCTCCTCGTCACCCGTCAGTATGGCGTCGCCGCACTGTTCGGAGGCGAGCAGTTCGCCGCCTCCGAGCTCCTACAACTCGGACTCCGCCCCCGGACAGACGTCTGTGCCCTCCTACAACCACTACCACCACGTTCAGCCCATGTCCCCCGAGGATGAGGAATTGCTCGACGTTATTTCATGGTGGCAGCAGACGCAATGA
>NlDa
ATGGAGGAGCGACTAGACGATGCCATAAATGTATTGCGAAACCATGCCGAAAGTCAGCTGGGTCTTCACGCTGCCATAGCTTCTGTAGCACATTCCTCGCCATCCCTCTACCACCATTCAGCGCCGCACCTAACAAGCCCTCACGGAGCGTATCAAACTTTGGTTCCTCTCACAGAATCATCCGATCCTCAAGGTCCTATCAAAATGGAAAGGATCCCGGTTTCAAAAAAACGTAAAGAGCCTCCAGAGACATGCGATACGAAGCCATCTAGCAGTGAGTTGATCAACAATGCCGTCAACTCGACGTCTCCCTCGGCCGTTTGTTCTGCTAAAAGTTCAAAACGGGCTCGTCGTTATTGTTCGAGTGCTGATGATGACGATGGTGACGATCCATCAACAAAGGCTCACAGGGAAAAAGAGCGGAGACAGGCAAACAATGTTCGTGAAAGGATCCGGATACGGGACATAAACGAGGCTCTCAAAGAGCTTGGGCGTATGTGTATGTCCCACCTGAAAACAGACAAGCCTCAAACAAAACTAGGGATATTGAACATGGCTGTGGAAGTTATAATGTCTTTAGAACAACAAGTTAGAGAACGTAATTTAAATCCGAAGGCGGCGTGTCTGAAAAGGAGGGAAGAGGAGAAGGCAGAGGACAGTGCTGGTCCAAAACTCGGTCATCTTGCTGTCTCACAGCAACTCGCTAACCCTCTTTTCCCTGTCACTACTCTACCTCCTGGAACGCAAGGTACACTGCCGCCCAATACACAGCCATAG
>NlNau
ATGTTGAGCAACGTGTATGATCATCGATTCAAGCAATCCTATCCTCAGTTATCATCAGATAACATGCATGTTGCCAAAGAGCAACAGACTGACATTCCAGCTGAAGTTGAGTTCTCAGCCACGGAGAGATACAGTAGAAGTGATTCTAGGTGCCAGCAGAGTTGTGGCGAGATCAGAGGATCGAGTCATCAGGACTTGGCTACTACCAGACAATATCCAGACAACAGGAGTTATGGATTTTTTCAGGAAGAGAGCGCAAACTATCAGAGGGATGCATCCACCAGGAACAAATTTCCTTGGCATTCACCCGACTCATTCACACCTGTGCGTGGTTGCAGTGTGAGCCCAGAGGCTGGCAGTGTGAGCAGCAATAGCAGCAGTGGGAGTGGGGTGGCTGTCGATTGGTCCAACAATCGATCTACATTAACAGAAGAAGATGAAAACTCAACAGCATCTTCAGATGAACACCACGTTCTTGAGCCGTCACATTCGCATGATCAGGCACAAGAGGTTGGACGCCGGTGTTTGCTGTGGGCTTGCAAAGCATGTAAGAGGAAAACGGTAACGGTCGATAGGAGAAAAGCTGCTACGTTACGAGAGAGGCGAAGGCTGAGAAAGGTGAACGAAGCATTCGAGATGCTGAAGCGACGCACAAGTTCGAATCCGAGCCAACGCCTGGCTAAAGTTGAAATCCTGAGGAACGCAATAGACTACATTGAGGCTCTGGAACACCTGTTGCACACCGACTCCAGCAGTCCCAGTTCCAGCGCAGGAACCTCCGATGAGACAAATTATTTGTTGGATGACGTGAGACAAACCACTCGACTAGTTAGTGCCCAGCCCACGCTGCAGGCTGCAGCTTCCGGAAAAAAGGAAAAAGCGACTGTCATGATCTAA
>NlTap1
ATGACTCATGTGCGGGTGGCGACAAGTGCTCGACCAATGGGAGAGCGGCATTCGGATATCGACCCTCGCGTCGACCAATCACGTGCCGCGGAGGAGGCTGTCAGGGGTGGCGAGCTGATAGTAAAACCAGATTTCGGCCGAGGGAAACTTCAGTCCGTTATGAGCTTGACAAAACTGAACATGAGAAGTTCAGAAAATCTCAACTGCAGCTTCGACTCTGTGAAGAGTTCTGATGACAGCTCACACGACAACGAATTCGATTTCGAGGAGGAGTCGACTGTGGATGGATTCGACAACGATGAGGACAGATTGCATGCAGCGGATGCCTCAATCAATGAGCAAAATGAGGAAGAAGACAAGAAGCCCAAGAGGGCGAAAAGCAAATCAAGAAGAGCCACGAGAGCACGAAGTCCAACTCAGATTCTGCGCCTAAAGAAGCACCGGCGCATGAAGGCGAACGATCGCGAACGCAACCGCATGCACATGCTCAATTCAGCGCTGGACCGACTCCGTTGCGTGCTGCCAACCTTCCCCGACGACACCAAACTCACCAAGATCGAGACACTGCGATTCGCACACAACTACATCTGGGCGCTCAGTCAGACTCTACACACGCACGCGCATATGCAAACGCGCGACGATATCACGCTCAGCGTCGGCAATGTCACCGTCTGCATCGGACAGGATGGCAATAATAGGATAACCTCAACAACAGGCAGTTGCGCGGTGGCTCAACAGCGGAGATGCAGCAACGAAGGTCGTCTACCAGATTTCAACCTTTCACCAATCCCCGCCTTTTCCGCCAAATTCTCTCCCGCCAACTACGAACAATCCCCACCTGTCACATCCACCCCCACCTACCAGCCTACCTACCCCCCTCAGGATCCACCTCTAACCAACCCCTGTGACCCCCCTCTGCACTACTTCCAGCACGACTGGAACCTCGACCAGGACTCGAACGGAGGCTTATCCCCAACCGGAGGGTACTCCCAGGGTAGCTGCACCCCCAGCGATCAGAGTGCCGAGTGGTACCAGGGACAGCAAATGAGTTCACCTGATTACGCGGTTGGAAGACACCAAGAGTTGACCTACTATGGTATGAACAATGACCGGTTCAATCACTACATGAATGCTCAGAGGCATATGTTCCAATGCCCTTGA
>NlTap2
ATGAGAAGTTCAGAAAATCTCAACTGCAGCTTCGACTCTGTGAAGAGTTCTGATGACAGCTCACACGACAACGAATTCGATTTCGAGGAGGAGTCGACTGTGGACGGATTCGAGAACGATGAAGACAGATTGCATGCAGCAGATGCCTCAATCAATGAGGGAAATGAAGAAGAAGACAAGAAGCCAAAGAGGGCGAAAAGCAAATCAAGGAGGGCCACGAGAGCAAGAAGTCCGACTCAGATCCTGCGCCTGAAGAAGCACCGGCGCATGAAGGCGAACGATCGCGAACGCAACCGCATGCACATGCTCAATTCAGCGCTGGACCGACTCCGTTGCGTGCTGCCAACCTTCCCCGACAACACCAAACTCACCAAGATCGAGACACTGCGATTCGCACACAACTACATCTGGGCGCTCAGTCAGACTCTACACACGCACGCGCATATGCAAACGCGCGACGATATCACGCTCAGCGTCGGCAATGTAACCGTCTGCATCGGACAGGATGGAAATAATAGGATAACGTCAACAACAGGCAGTTGCGCGGTGGCTCAACAGCGGAGATGCAGCAACGAAGGTCGTCTACCAGATTTCAACCTTTCACCAATCCCCGCCTTTCCCGCCAAATTCTCTCCCGCCAACTACGACCAATCCCCACCTGTCACGTCCACCCCCACCTACCAACCTACCTACCCCCCTCAGGATCCACCTCTAACCAACCCCTGTGACCCCCCTCTGCACTACTTCCAGCATGACTGGAACCTCGACCAGGACTCGAATGGGGGCTTATCCCCAACCGGAGGGTACTCCCAGGGTAGCTGCACCCCCAGCGATCAGAGTGCCGAGTGGTACCAGGGACAGCAAATGAGTTCGCCTGATTACGTGGTTGGAAGACACCAAGAGTTGACCTACTATGGTGTGAACAATGACCGGTTCAATCACTACATGAATGCTCAGAGGCATATGTTCCAATGCCCTTGA
>NlMistr1
ATGAAGTCAAGTATGAGTGCCGACAGCATATCAGGGAGCTGGATGGAATCGACAAGGAGACAACAGCAGGCAAAACATATCGAGAATGAAACTGATTCTTCATCGTCGCTGCGCGAAGTGATACCACACGTGACCAAGGAGCGACGGCTGTCAAAGATCGAAACGCTGACACTGGCAAAAAACTACATAATGGCGCTGACCAACATGATTTGCCAGATGAGGGGTCACGACTCGCCCTACGAGGAACAAGGGGCTTCGACCACCCCTGGTGGGGCAGAGGGGGGCCCCGCCCCCCCCTCGCCTCCCACCACCGACGAGCACAGTCTCTACGATTTCGAGTAG
>NlMistr2
GATAGTTCGGGAAGCGAGGGTCCCAACTCCAGTTCGTCGCGGAAGTGTTCGCGCGCCAAACGGAAATGTCTGCTCGGCGCGAACAGTGCTCGTCGACGCAAATCGGGGCTCTCGGCCAGAGAGAGAAACCTGCGCCGACTTGAGAGCAACGAGAGAGAGAGAATGAGAATGCACTCGCTCAACGACGCCTTTGAGCAACTCAGAGAAGTGATACCCCATGTGAAAATGGAACGAAAACTTTCAAAAATTGAAACCCTTACATTAGCCAAGAACTACATTATGGCACTAACCAATGTGATATGTGAAATGAGAGGCGATGAAAAACCTTATACGTGA
>NlOli
ATGGAGTCGACCGGAACCTACTTTTCGACGGAAGCAGCCCAAGTGCCTGGCAGACGGACGCCGCTGGGTGCAGTGGGTCTGGGCAGTTTCTACTACCCGCCTACGGCCAGTGGCCCTCCCTCCGACGAGAACCGACCCGATCCTGGTCCTCATCCGTCCCATGTCTCCAGCAGACTACAACAGCAGCAACAGCTACAACAGTTGAGCGGACCAGTTGTAGGGGGCAATTCGTCAGGCTCGGCCGCATCCAAGTCGAAATCGCGTCAGGGCAAGCTGGTGAGACTGAACATCAACGCGAGAGAACGCCGACGCATGCACGACTTGAATGACGCGTTGGACGAGCTGCGAAGCGTCATTCCCTACGCGCACTCACCGTCAGTGCGGAAGCTCTCCAAGATTGCCACCCTGCTGCTGGCCAAGAACTACATCCTCATGCAGGCCAATGCACTCGATGAACTGCGCAGACTTATCACTTACATTCAGGCTCAAGGAACGATGTCGATTCCACCAGGATTCGATCTGCAGGCTGCTATGATGCCTCCAGGGCAACCCCCCACTTCACCACCCCCGTCTTCTGACCCACCATTGACATGA
>NlCato
ATGAGAGGGGAGGCAGGGCCCTACCAGCAAGGCCTCAGCCTGAGCGTGGATCTTGCCTACACGGGCAGCATACTAACGCCGCGACCAATCAAATTCCAGCCGTCAGTCAACATCTTTGTGGAGCAGAATGGGCAGCAGGTCGAAGAAGTAGGTACCACGGCATGGAATAACTCGTGGCCGTCGATCAACTTGAAAGAGGAGGAGGATTGCTACGGAAAGCTGGATGCATACGAGAGGCGAGCGGGTAGTTTGGGCTGTCCGACACCGCCGTCGGAAAAGAAGTACTTCTGGCATCCGTCACAGGACGCCGATTCATCGATAGCCAGACGCGGAGGCGCCCGCCGACGCCGCTGCAACTCGGAGCGTCGCTGTGGCGGGTCGGCCCCGCTGCCNNNNNNNNNNNNNNNNNNNNNNNNNNGACCCCGCCTGCCGTCGCCGACCGTCGTCAAGAAGCGTCGCCTGGCGGCCAACGCACGTGAGCGGCGTCGCATGAACGGCCTCAACGAGGCTTTCGACCGACTGCGTGACGTCATACCGTCGGTCGGCGTCGATCACAAACTGTCAAAGTTCGAGACACTGCAAATGGCGCAGACCTACATTGCTGCCCTGTGTGATATGCTGCAGCGTACTTCCAGGTGA
>NlAto1
ATGTTTAGCCGGTATCTTCTGGGACGTCCTCAGTCGCCTCCACCGTTCTGCAAAACCTACATGACAACAAGTCTCCCTGTTCTTCCTCCACGACGTTTGGATACACTGTCGGACGGTTGTCATACTCCAAGCCCTGAGAGTCTACGATCTCCCAGTCCCACAGACCTCCTCCACGTTCACCGAGCCTTCTCAGATCTCCCTCGTAAACAGTACGCTTCTCTACTTCCATCAGAGGCTATACATTCACCGTATCCTGACGTGTTTGTACCTGTGAAAAGCGAGCGTCTCGAGCCTCCGAAGATCAACGCACCGGACGATAGCACGTTACTAGGAGGTGGACGAACCCCCTGCTACGATGATGAGGAGGAAGATGACTCGAGTGTGTTCTCCAGTGGCGAGGAGTCATCCTCTTCGAAGACCCGCTGCCGACGGACCTCCCCCGGGAAGACGGCCAGCCCCGGTGTGCTACGCAAACGACGCCTAGCAGCCAACGCCCGGGAGCGGCGTCGCATGCAGAACCTGAACAAGGCCTTCGACCGCCTCCGTCACGTCCTTCCCTCCCTCGGCAATGACCGACAGCTCTCCAAGTACGAGACACTGCAAATGGCGCAAACCTACATCAATGCCCTCTACGACTTGCTACAGTGA
>NlAto2
ATGGCAACGGATATGTTTAGCCGGTATCTTCTGGGACGTCCTCAGTCGCCTCCACCGTTCTGCAAAACCTACATGACAACAAGTCTCCCTGTTCTTCCTCCACGACGTTTGGATACACTGTCGGACGGTTGTCATACTCCAAGCCCTGAGAGTCTACGATCTCCCAGTCCCACAGACCTCCTCCACGTTCACCGAGCCTTCTCAGATCTCCCTCGTAAACAGTACGCTTCTCTACTTCCATCAGAGGCTATACATTCACCGTATCCTGACGTGTTTGTACCTGTGAAAAGCGAGCGTCTCGAGCCTCCGAAGATCAACGCACCGGACGATAGCACGTTACTAGGAGGTGGACGAACCCCCTGCTACGATGATGAGGAGGAAGATGACTCGAGTGTGTTCTCCAGTGGCGAGGAGTCATCCTCTTCGAAGACCCGCTGCCGACGGACCTCCCCCGGGAAGACGGCCAGCCCCGGTGTGCTACGTAAACGACGCCTAGCAGCCAACGCCCGGGAGCGGCGTCGCATGCAGAACCTGAACAAGGCCTTCGACCGCCTCCGTCACGTCCTTCCCTCCCTCGGCAATGACCGACAGCTCTCCAAGTATGAGACACTGCAAATGGCGCAAACCTACATCAATGCCCTCTACGACTTGCTACAGTGA
>NlNet
ATGGTTGAGTGGAAATATAGCTATATTTATGTTAGCTGGCGGCACGGCGTCGGCAATGGTGTTAAATCAGTGATTGTCGGCGGGGCCGGGGAGGGGTCAGGGAGGAGGAGTTGTTGGTCAGGTGGCGCGTCTCTGGGCTGTGAGGAGGAGGAGGAAGAGGAGGAGGTCTGGCGCCAGATGTTTAACTGGCGCCTGGTGTGCATTCNNNNNNNNNNNNNNNNNNNNNNNNNNNNNNNNNNNNNNNNNNNGATGTTTAACTGGCGCTGGACAGGAGTCTTGCCTTGCCACCGGTTTCGGTCTACCGGTCCGGGCGGTAAACCAACCGGCAAGCACGACTTCCTCTCACTGCCAGAAAACGCCCAACGTTGGCCACGCGACTCCAGAATAGCACACGCGACATCAAGCAACGAGATTGGTTTTGTCACAGATCTAACTGTTTACTTAGTCTATGATTTTGATTATTTAGTTCTACCTTGCGGTCTCCATCAGGACCGAGACTCTGGCTTCAGTTCGGCAGAGTACGACCTTGACAACGACCTTCACTCGCCGGCGGGCCGCAGCGACGGTGAGCACCGGCCTCGGACCCGCNNNNNNNNNNNNNNNNNNNNNNNNNNNNNNNNNNNNNNNNNNNNNNNNNNNNNNNNNNNNNNNNNNNNNNNNNNNNNNNNNNNNNNNNNNNNNNNACGCAGGCGGCGAAACCCCGCCGCCAACGACGAGGCGACGGCGGCCAAGCGGCGCAAGCGGAAAAAAGACGGCGACGACACTGACGATCCGTTCCGTCCGTGGGGGGGCAGTGACGAGCAGCAACCCTTGTCGCTAGTTTTGAGGACGGAGAGCGAGGATACCAGTTACCGACCTCAGGATGTTGTCAGACTGGGCAGTAAAAAATTGGCTGCAGTCGCTGGGTGCAGCAGTAGTAGTAACAGCAGTTCTAGTCCAAGTAATCATAAACCAGATAACAACAGTAGCAATCAGCGAAACTACAAGAACATGACGCGTGAACGCCGAATCGAGGCGAACGCTCGCGAGCGAACGCGAGTGCACACGATCAGTGCCGCTTTCGACACGTTGCGGCGGTGTGTGCCGGCCTATTCGCACAGTCAGAAACTGTCCAAACTGTCAGTGCTGCGAATCGCTTGTGCGTACATTTTGACACTGAGTCGAGTGGCCGGCGACGACTACTCGGCCGATCACAGTCAGCCGTCCCTCGCCGATTGCGTGGACAACGTGTCCAAGACAATACAGATGGAGGGCAAACTGCGCAAGAAGAAGGATGAGTGA
>NlMyoR
ATGCAGGAAGAGTGCCTTGCAGTCTGCATTTTCGGAGACAGTGAGGTAAGTCGTTTGGGCAAAGAAATCTCAACTGTAAACTTGGAAGACTGCAAAGAGGAACAGAAGTGGTCGCACACTGCTTCACATGTTCAAGATTATCAGCAGCGTACCTATCGGAGTGGGATCGGTAAGCTGCATGATAAGCGTTGCCCGTTATCGTCCGTGATCGGATCGGAGAGGGATCGGAACGCTGCCGGTGTGTCTCCGGCTTTACTGTCGATCACCGGTACAATGCCCAGACACCACCGATCCAGCGACGACGAATGGGACGACGACACGGAGGACGGATGCCAGAAAGGTGGGGGCGGGGGAGGCCAGCAGCGGAACGCGGCCAACGCACGCGAGCGAGCGCGAATGCGCGTCCTGTCGAAGGCGTTCTGCCGCCTCAAAACCACCCTGCCCTGGGTGCCCGCCGACACCAAGCTCTCCAAGCTGGACACCCTGAGACTCGCCACCAGCTACATCGCCCATCTGCGGGCTGTCCTCTGTCTCGAGGACCAGCCTGCATCGTCGCCTCTAGCTACCGTTCATCCTCTCAACTTGACATGGCCGTTCAGCTTCCAAACACCAGTTGTGTCGCCAGGGAGCAACGGAGCAGCTGTTAGCATCAACAGTGACTGCAGCAGCGGCAACTGGGCGTCAGACCAACGACACGACCGAACCAGAACCGAACCGTACTACGAGCGAACGTCGCACGACCGGTCGGCAACAGCGACAGACGACTATTGCAACGGCCAGCGACACATCTTCAGAGACCAGCCGATCACTTCATTCCACGCAAACTCATATCACGATCCGCTCATGCAGATCGGATGA
>NlSage
ATGAAGTTTGAATTTCCACCACAACCTAATTCAGTGTTGTATTTTTCCATTGCAGATTACAAGAAGACAGCATGTGACAGAGAGCGAACAAGAATGAGAGACATGAACATCGCGTTTGATGCTCTCAGAGATAAATTGCCGCTATGCAAGCCTCCTGGCAAAAAACTATCCAAGATTGAATCCCTCAGGATGGCGATACGCTACATCAACCACCTACAAGGGTTGCTTGAATTTGGCAACGAATACGACGACCGTTTCCTGCCTTGTGAGCATTCCTCCCCCGAAGGCCGCGACGACCTCACACCCCCGCCGCCCACCCAATGGGCCCCCTCTGCCCCCCTCTACTACTACCAGAGTCCACTCACCATTCCCCCAACAGCATCCATACCACCATTCAGCAGTTACACTGTTCCCTATACACCATATCACACCACTGCTTACAACCATTGA
>NlPxs
GTGGATTTCAGTGTGAATTCGGCATTCACAGTGCTACGCTCTCATATTCCCACTGAGCCAGCCGATCGTAAACTGTCGAAAATTGAGACACTTCGATTGGCTACAAGCTACATTTCTCATTTGGATGCTCAACTCACAACAGGTTAATGTTCTTTTAGTTCTTGATTATTAGGAATATTCAATACACTTTCTTAGATGTAAAATATAAGGTCTAATAATAATAATAATATCCAAGGTTAAG
>NlTwi
ATGTACGGCCAGTACACATCAGAAAACTTCTACACCTCAGAACATTTTTCTGAGGATAAAAGAGATTCGTTCATTTCTATACCACGAGTGAAACAGGAGTGGAATAGGAGCGAATCTTACAATCGAGGCAAACACGACTTGACCAGCAGCACTCACGATCTTCAGAACAACGAAAACAATAACTGGAGTAATGTGACAGAGAACAACAACATGCTGCAGTCAGTGTGCTACAACAACATTGACGACTGTTGTTCCGTGGGGCAGGAGGCGGTGCAGATGGCTGCGGAGGCAGCGTCTGCTGCCCCCAGGAAGAGGAAGAGGTCGCGCTCATCCAGCCTCAACAAAAGCCCTCTCAGCGAATCCAATTGCGGCAAGTCCAGAAGAAGGCTATCTTCACATAGTGTCGAAGAATTACAGACCCAGAGAGTTATGGCGAATGTAAGAGAACGCCAAAGAACACAGAGCCTGAACGAAGCATTCGCCTCATTGCGCAAGATAATTCCGACTTTGCCTTCAGATAAGCTGAGCAAAATCCAAACCCTCAAGTTGGCCGCTAGATACATAACGTTCCTCTACCAAGTGTTGCATTGTGCACCATCCGAACAATCAAACAGCAGCTCAACTGCTGCACTGCTTCCAATCAAGAATGAATCGTGTGATGACTCAAATGGTAATTAA
>NlFer1
ATGGACAGCAACTCGGACGTGGAGAGGCACTTCCTGGATGGCTACGTGGGCAGTTCGAGCTCGAGTAGCACGGAGTTGTTCCTCTACGACGATGACTCCAGCCACTCCGACTGCTCAACCGCCTACTCCTACGGCAGCGACCAGGACAGCTCCTCAGGTAGCAGCAGACTGCGTCACCGACGCCTAGGCGTGGTTAGCGGTGGCGGTGGCGGGAGCGGGAGCAAGTGTCCGCAGCAGCAGATGCAGCAGCGACAGGCGGCCAACCTGCGCGAGCGACGACGCATGCAGAGCATCAACGACGCATTCGAGGGCCTTCGCGCGCACATTCCCACTCTGCCCTACGAGAAACGACTCTCAAAGGTTGATACGTTGAAATTGGCGATAGGATACATCAACTTTCTAAGCGAATTGGTGAGGACAGACAGGGGACAAACTGAATCCTGCAAGGGAAATGGAATAGGAAAATCAAGAAGACAAATACCAAGAGAAGAAAATCGGAAAATCATTGTGAGAGGAGCTTACGGATCGCCGTATGCGGCGCATTCTCTGTCTTGGTCGAGCAACAAGGAGAACGGATGCAACGGCGTGATGTACGCCAAGGTGTGGACCCCCGAGGATCCCCGCGCACCCCCCAAGCACCCCGCCAACGCCAACACAAGTCCAGGGCTCAACGACAACAACGCCAGTAACCACGGCAGTGACTACTGA
>NlFer2
ATGACGCCAAATACGCATGAAATCGGCGTTCTCTTTTGTTTTCTAGTTTCTTTTCGAAAACAAAATGACGGTGGGACGGTGCTTAAAGGTCAGCCGCAAGTGTACGATGGTGGTGATGAGCTGCCAAGCTGCCTGTACGCTGCTCGACCACACCCAAGGCTGACGCCATATTTGCAACATCTACAACATGGAGACGAGAGCGGCCACGACACGAGAGGAGGCGGCGCTGACGAGGTGTTCTTCGGTGCCGGAGGCGGCAGTTTGGCCGGGGGCGGTGGCGGGGGCGGCAGTCCGTACCGCGTGCAGCGACAGGCGGCCAACATACGCGAGCGCAAACGCATGCTGAGCAGCATCAACTCGGCGTTCGACGAGCTACGAGGCCACGTGCCTACCTTTCCCTATGAGAAGCGCCTCAGCAAGATCGACACCCTGCGCCTAGCCATCGCCTACATAGCCCTGCTGCGGGAGGTGCTCACTGCTGACTGCGACCCGCTCACCTACGTCGAAAAGTGCCTGCGTCAGCCAAACGCCAACGCTAACTCGGCCGATCGCGCCGAGTGGAACACTTCAGAGACCAGGTTCCACATCCGTATAAAATTGCAGGAAGAATACACATTTTTAGTATCTTTTCCTGATTTTCATGGAAATTTCATACCTGAAGAAATAGCTATAAATAGCTTTTTGAACATTGAACAACCAATTGCCACTCTTCTGGTAATTTCTCCCCCCATTGTCCGTTATCTCTTCATCTTCTGCTCCAGAAAGTCTTCAGAAAAGAAAATTAAGAGGAGACGATCCAGTAGTAACAAAAGAAATGATCACGATGATAGTAACTCTGATAACCTATTTTTTGTTTCTGGTGATAATGCAAATGAATCAATGTCAACCGGTGAGTCTAAAACTACAGATGCTAATTATAAAGGAAGGATTCTGCTACCGGTAAGAGTATCTTGCATTGAAATATTTAATGAGGATTATAGAGATTTGTTATCAAGAGATCTGCCTTCTGCTAGACTTGAAGTAGTGGAAAGTCCAGGTGCTAGTCCCTTTATAGAAAATGTCACAACTCTTATAGCAAATGAACCTGATGATATCAACGAAATAATTACACTTGGCAATAAGAACAGGGTGTTTAGTGCTACTGCTTCAAAACCACACAGAATATCTCATTCTGTTTATACTATCACTACAGAAACTATACATTTTGATACGAAAAGAAGTAAACGTTCAGCAGTGTTGTCTCATTTTCATTTGATTGATATGGCTGGTTCCGGTATCAAAAAGCATATGAAGTGTGAATTGAGAGGGAAATCTCCAAAAGAAGGAGGCAAAATCAGTTTGCCACTTTACGTATTAAGAAAAACTCTTTCAGCTGTTGATAATAATGCAATGTCAAGAATGCAGTACAAGCGGTCGACAGTAATGAAGGTTCTTGGCACCTTAATTGATTGTACAACAGAAACCAACATTAATTCAATTGAAGAAGTAATATCTCTACATAATCATCATAAGACAATAAGTAAAAAGAAAAGAGTATGTAACAAAATTCCCAAATTCAAAAGAAGATCTGAACTGGACAAAAAAGACGTCTTAATTCGACGATACAAAAAAGAGATAAAACAATTGGAGAAAGAACTCAAGGCATATGATGATGAAGAGCTTGTAGATCCCTACCAAGAGTATTCCAGACTGCAGGCGGAGCAAGTTGACACTTCAAAAAAAGTTAATCAGTTGCAAATAATGTTATGTGAAGCACATTCAGAACAGAAGGATGCATTTGTCAATAACCAGAAAGAAATGAAACGATATCTCAACAAATTGCATTACCTAAAAGAAAAGTATTGTTGTCAAGAAACTTTGATAAAAGCCTACATTGGGGAAAAATATAAAATATCTTGA
>NlHand
ATGAACTCTTCCACTTGTTTCGAGAGTGCCCCACAGCACCATTTAGGTAACATAGGTGGCAACGACAATGGATATTACGTGCAATTTGCTGGTCACAACTCGGCTTACTATCCAACCTATTTCGGAGGACAGCCGGTTGAAGACTTCATCGAGCCAGACGTAGACGATGAGACGAAAGGGGGCGTATATCGTGCCCCGGCGGGGCCGGAATCCAGGGAAACCCGTGGGGGGGCCTACTGGGGAAGTCCCCTGCCCCCTGGAGGCGGTTCCCCGGCAGACGCCAGCCAGGCCTACTACTGTGGGGGCGGCGCAGAAGGCAGCGTCTATCTCAGCCTAGACTCTGGAGGCGGCAATAGGACATGCTATGCCAACGAAGACCTGAAAGTTTCGCCGCCTCCACACTCTACCAATTATGTACATGAGGTGGTTTTCGGTCGTTACACGGGCGCTTCGCCCGCCGACTCGTCAGCCAATAGCAGCGGCGATCTGTGCGAGGGTGCAGGAGGGCCCCTGGTCTACGGCGACCCCTTGGCACCTCCTGGGGGAATGCTGGGGGGCCTGGGGGTGCCAGGGGGCAACGAGGTGCCTGTCATACGAGTGGTGAAGAGACGCAACACGGCCAATAAGAAGGAGAGGCGGAGAACACAGAGTATAAACAACGCGTTTTCGGATCTGCGTGAGTGTATTCCGAACGTGCCAGCCGACACCAAGCTCAGCAAGATCAAGACCCTACGCCTGGCCACCTCCTATATTGCCTACCTGATGCAGGTGCTGCAAGGGGACGTCTCCGTGGTCGGCGAAGGGTTCAAGGCAGATCTCAGTGCTCACTCCTCACGCAGACACAGCGCGCCACAAATTAGGGCCACCAATCAGGTAAAAACATAA
>NlSCL
ATGAGTTCCAAGATAGAGAGCAGACTAGTAAAAAATACAATTCAGGAGATTGCTCCTCTCAATATTGTTCAAGTCATATGGAAATCATTTATGAAAGTCCCGTTGATAGTGGGTGTGGGAGGCGGCAGTGGAAGCGGCGTGAACGGGAACGGAGGCGGCGAGTGGACAGGAGACGACCAATCAGCTGCCGACTCAGAGGACGAGGAGCTGCTGTCGGACGAAGTGTCGGACTCCGACGAGGCCGGATCCGGCGGAGTCGGACGTGTCGGACAGCAGTCGGGGTCCGTGCGGCCAGGGGTGCTGAGGAAGGTGTTCACCAACAGCCGGGAACGCTGGCGTCAGCAGAATGTCAGCGGTGCGTTCGGCGAACTCAGGAAGCTCGTGCCCACTCATCCACCCGATAAAAAACTCTCCAAAAACGAGATACTGAGGATGGCCATCAGATACATACGACTCCTAACAGGGGTTTTAGAATGGCAGCAACACCAGTACATACAAAACGCCAACAATAACAATAATGTAACAACGGAAAACAATAATAACATAACTAGCAATAATAATCACTACGGTCATGGAGATTTCAACAGACGATCAAATCCTTACAGAAGAAACCATATTGCAAACCATCGCACTTCACCTTACAACCACAAGGGACACCCATCCAGTCCACAGTTGTCACTCAGCTACTATTTTTCTGAGGAAGTGTTCCTCTATAAAATGAGAGAACAGTGCATAAATGTACAGCAGACGTCACTACATGAATATGCAAGCAGCGCGATGAGACTGGAAAATGCGTTGAGTAACGCATCCGACGCTCGAGCAGTTGTACAATTTCCTCTTGGATTCCGTCTGAAATACGTCGGCGATTTCCACTTTTGTCTGGAATAA
>NlNSCL
ATGGAGAAGCGTACTTTTGGAGCTCTGCATGTGCTCATTCAGCATGCGAGAGAAGGAGGAGGCACCCTGACGCGCGAAGAAAGACGTCGACGACGCAGAGCGACGCAAAAATACCGGATGGCACACGCGACGCGCGAACGTGTGCGTGTCGAAGCATTCAACGTCGCGTTCAGCGAACTGAGAAAACTTCTACCCACTCTACCTCCTGACAAGAAACTATCCAAGATTGAGATACTACGGCTGGCTATCTGCTACATCGCTTATCTCAATCATGTGCTCGATGTTTAA
>NlDel1
ATGGATCTGGGAGGACTGGATCTAGACGCAGTGGTCGTGAAAACGACGCTGGATATGTGTGATCCCAACAACAATCAAGATAATTTATCGGCAGTCGGAGACGAGATTTTGAACGGAGTTGCGAAAAGCTACTCGTTGCGACCCAGGTCGTCCGTACGACCAGGATTGGCGATAACCGAAGACAACGCGACACCTGACTGGAGGCCTAGAGGGAGAACGAAGAGGAGAACAAAACAGAAACCGCCTCCCCTAAGTAAATACAGGAGGAAGACAGCCAACGCGAGAGAGAGATCTAGAATGAGAGAGATAAATGAAGCGTTCGAGTCGTTACGGCGTGCCATACCTCACCTATCACACGAGGCCAACCCTAGCGAAAAACTGACCAAAATCACAACCCTAAGGTTAGCCATGAAGTACATAGCGGCCCTTACTCAAGCCCTGAACGATCCCGAACCTGAATCGGACCTTGATTCAGGTGATTACACTCTCTCACTCACTCCTACGTCGCTCAGTGACCACTCTCTCGCTTCGGATTTCTCAGACAACCTACTGCCGTCTACTCTGGGATCAGCTGTGGGGGATTTGTCGATCACCACGGATTTCCATTCGCATGGCTTGCTTCCGACATTTTTCACGGATGTCGTCACGGATCCGTGTCTGTCCCTGCCTGACGACGACTTTGGACAAGCGGCATATGTTTTCGATGACGTCAGCCTCATTTCAGAGTTCAGCTAG
>NlDel2
ATGGACAAACCACCCATAGTTTACAAAATGGACAAATTGGCCCCTAGTGACCCCAACAATAACAGTAGGGTAATCTCCGCCAAGCCATCTATCGACAGCATCAACAAGAGCTACTCACTGCGCCCGAGATCCTCAATACGATCACATGGGGAAATCGATGATGACATCTTGATAAACGACTGGCGTCCCAGAGGCAGAACGAAACGGAGGCCCAAGCAGAAACCGCCTCCTTTGAGTAAATACCGCAGGAAGACCGCCAACGCTAGAGAGAGATCTCGAATGAGGGAGATCAATGAGGCATTTGATACTCTGAGGAGAGCTATACCTCATCTCACCCATGATAACAGTCACAGTGAGAAGTTAACTAAGATAACCACTTTGAGGTTGGCTATGAAGTATATAGCTGCCCTGAATCAGGTCCTACAGGATCCAGAACCTGAATCAGACCTGGATTCAGGTGATTATACTTTATCCCTCACGCCCAACTCACTCAGTGAACACTCAGATCTCTACGACCAGTTCCTTAACTCCGATTTGGCGTCGACCTCCTCCACGACTACCAACTCCTGTCCGTTCAGGTCTCCCTCGGACCACCTCAGCAAGTTCGATCTAAGTTCCTCCTCACTCTTGCCAACCTCACCGAACTGTTACTCGTTTGCTGATGACGTCAACTCTTCAGCGTCGATGATGGATCTGAGGCAACACTGTCTGACGCCAACTGATGATTTCGAGGCTGATTTGGATTCGTTTGTGACGTCAGCGGTGGATTTTGAGGAGCTTTTTGCTTCGTGA
>NlDel3
ATGCTGGCCACCATGAACCCGCAGGTGCTACTCCTCCAAACGAGCGACTCCAACAACAACCGGAGTCCCCCCCTCGACAAGTGCTATTCGCTACGCCCCAGGTCGACCTTGAAACCGCACGAAAGTGACCTTGAAACCGACCTTGACTGGAGACCTTCCCGAGGTCGCACCAAAAAACGGCCCAAACAGAAACCGCCTCCCCTCAGCAAATACCGTCGGAAAACCGCTAACGCTCGCGAACGTTCGCGAATGCGGGAGATAAACGAGGCTTTCGAAGCGCTCCGGAGAGCAATTCCTCACCTATCAACCTCCAGTGATAATCCCAACGAGAAACTCACAAAAATCACAACCCTAAGGTTAGCTATGAAGTATATTTCAGCCCTGAATCAAGCCCTACAAGTTGACGCCCTACAACAACCCGATTTCGAATCGGACGCCGATTCTTTACTTTCTGACTACACTCTAACTCCAACACCGGCTTTCAGTGAACATTCCTCGCTAACTTCGGATTTCTCGGACAATATTTTGCCGACAGTTTCGTTCGCCGATCCGAACACTTTCGTTAGTCCGGATGATGATTTTTTCGGAGCAACTGGATTGGTTGTGCCGGATTTGGGAGGTGGTGGCTATGTTTTCGATGACCTCAGTTTTGCGACAGACTTCAGCTAG
>NlMnt
ATGAGGACGTCTCCAGGTCCTAATGCTAACCATAATCTACTGCCGTATAATATAGACCAGCAGCATCCAAGTCATCCACCCTTGAGATTAGGAACTCGCGAAGTGCACAACAAACTAGAAAAAAATAGGAGAGCACATTTGAAACAGTGCTTTGAACTGCTCAAAAAGCATGTTCCGATCTCTCCAGATGAGAAAAAAATTTCCAATCTTAATATCCTCCACTCAGCTACAAAATATATCCAGACTTTACGACGGAAAGATCGTGAATACGAATACGAATTAGAAAAACTGGCCCGACAAAAGATAGCTCTCCAACAGCATTTGGCAGTTCTGAAACGTGAGCGGTCCGAGGCATCTCCAATCGGCTCTTCACTGATCATCGAGGAGAGAGAATCTAGAGTGACACCGTCTCCCCCAATGCGATCGCATGAGCACATAATACCTACAAAAATTCAGGTTGTACCGTCAGCAGCGTGTAGTAAGAGTACAACGGGATTGCTTGTGAGTTCAGGATCGACTGTCCAACTTCTGTCAGCTCCAGCTCTACGAGGTATCCCAGTTACGAATGGTGTGCTTAGTCATGGACGTGTGACTCTTGCTACATCAGACTCGAACCAACTGATTCAGCAAGCACACATGGTCATCTCACAAACAAATGGAGGCAAACAAGTTCTGCTTCCCCTAACTTCTCCAACGATAGGTGGAAAAATGTTGCAGATGCCAGTTGTTAATCTTGTGAAGCCTTCAGTTGTTGTAGTTAGCAGCCCTTCCAATTCTACTCATTGA
>NlMad
ATGATTCACTATGAAGAGATAGCAGACCTCGTATGTCTCCAACGTTATTGTCCTGTCACCAGCTGGCTTGGATCTTTGTTTATAAGTAGACTTGATATGCGCGAGAACACTAGCGTCAGGCGAGCACACCTTAGGAATTGCTTGGAGAAACTCAAAGAAATGGTTCCCCTGGGCAACGAAGCTTCTAGGCATACCACTTTAGGTTTATTAACGAAAGCGAAAAGGTTTATTAAGAATTTGGAGGTGCAGGAGCGAAAGCACGCGATCCAGAAGGAGCAGCTGAGTCGGGAGCAGAGGTACCTGAGGCGGCGGTTGGAGCAGCTGGGCGTCGGGACGCACTACGGCGGTGCGGCGTCGCTGGGCAGCGGCGCCAAACGACGCTCGGTGTCTGAGTGCTCGCTGTCCAGCACACTGTCTGCGTCTTCGTCGGCGTCCTCGGCGTCGTCCGGAAGCGTCCTGTCGCCGTCCATTTCCGAGTCGGACGAGATCGACGTGATCGGCTACCGCAGGCGCCGCGGGGGGCGGACGGGCNNNNNNNNNNNNNNNNNNNNNNNNNNNNNNNNNNNNNNNNNNNNCGGCCACAGCAGCAGCGACACGGACGACCAGAGCAGCGTGCAGTCGGCGTCCAGCGATAGCGGCGTCGCTATGTCCACCAGCCGACTCACGCTTCACGACATGCAAGTCATCTAG
>NlMax
GGTCGGAGAACGTGCATCACCATCATCGACAGCGTGTCTGGAGTGTGGAGTGTAGAATTATTGTAAATTTTGTAAAATTTTATCGTTTCTTATATATTTTTTTAATCTTAGTAACAAATTGTTTCTTATTATATTATAACTAACTTGTACAATTATGGATCTTTCCTGTTAAATACATTCTATTTATAGAATCGCGACTTCAACATTTTCATCAGAGTTGAAAATATTAGGCTTGTCCTGTCCTTACTATTCTAGGACGAGAATAATACTCTAGATAATAATATAATGAGTGACGACGATAGAGATATTGATATTGAAAGTGCGGAAAAACGGGCACATCACAATGCTTTGGAACGGAAAAGACGAGACCACATTAAAGATAGTTTTAGCAGTTTGCGAGATTCCGTACCGGCTCTCCAAGGAGAGAAAGTGGCCAGCCGAGCGCAGATTCTGAAGAAAGCCGCCGATTACATACAGTTTATGAGACGGAAAAATTCGGCTCACCAGCAGGACATTGATGACTTACGGAGGCAAAACTCACTTCTTGAATCTCAAATTCGCACATTGGAAAAATCAAAACCTAATGGAAACTTTGCAGCTGATCCGAATGATTTAGGGTTGGAGAGTGGCTACCCTCATGAATCAGGGTCGGACACTTCAGATTCGGACACTAGATCTGCTAGGAAGACGAAAAAGTTGAAAGTGAGCAGTGGCCTGTGATGGGAATGGACGCTACCTTTGAGAATGTGCTGGTGTTGTGGCTATGGCGGTCCCTTCCATAATCGCACAACCATGTCCCTCGTTCAACTTGTCTTCTGAGAACTTGAAAGTATTACTGTCTCCTTTGTTAAAACCACAAATCCTGTGACGTATGAAGAGTTGAATGTTGTATGTGTGAAATTTATCAATCAGGGCCAGTACCCTGTTTAATGATTAGACACTTTCTATTGAAATGTACTCTAGCTGATGAGTTATTCTAAAGGTGCGTACATGAGCAATTCACTTTTAATCACTTTATTCCATTCTTTTTCTATTTGTGTCTTACTGTTTCTATATAGTCAGCTGATTGAAAGTGAATTGCTCATGTTCGCGGTGCGTATCTGTACGCACCTTTAGACCGCTTTCCGTGTGAACACTCCCTTAGACTGCTGATATGAGACAACACAATGAGAATTGAAAATATAACGAATCTCCTTCCTTTGAAAATTCTTAGACTGGTCACACACCGATTAGTCAAGACAAGACTAGTCACGTTTGGTCACAATACTTCACATAGTTGCTTATGAAGACATGTCTAATTGCAATGACTAATCAGTGTGTGTTGCGTCATAAGCATCAATGTGGAATATTGTGACTAAACGTGACTAGTCTTGTCTTAACTAACTAGTGTGGGCCCAGCCTAAATTAAAAAACTGTATTGATGAGAAAAAATTAAGAATTAATCATAAGATTATGACAAAACACAGTCTAACGGTGCTGAGTCAAGATTTTGGGTGGGAATGATTTAACTTTTAGATGCTTTGTCAACGTCCACACACCACAGATATATATAGTTGTCAACTAGATAGGCCACTAGTTGTTCCTGATTCCGAGGGCCTGCTCCAATTCGGCTCGCTTCTGTTGCACTTTAGTGTAGAAGTAGCGGCAGACCGCCTCCTGGGCCCAAGGTTGGTAGTAATACTCGGAGCGGCGCTCCTCCTCAGGGTTGCCAACCACATCCGTCATTGTCTTGAGATCCCTGGTCTGCGAAACAATCCACTTGTTGATAAACTGTTGCGGATCCTTGGCGAAGCTCAGAAAGAACTCGCGGTTAGTTTTCAACTGGTTGATGGTCTCAACTGTTTCGTGTATCTTGTTGTCCAGGCCCTGTATCTCCTGCTGGGAAGCAGTTGACAGCAGAAAGTTGTTCATCTGCGCCTTCAACGTGTCGTCAACTTCAACGTCAATGTCGTAGCAGGCTGTCTGCTTTTGCTCTGTGCCTTCCACACTGATAATGTGGTTGATAACGATCGGATCGGGCGGATGAAGAAGGGGGTTGAGCCGCGTCGGAATTTCGGCGAACTTCATGCGTTGACACGCGAAAATCTGCTCCAGATATTTGTCACAGTTCACAAACTCACGCTCGTGTCCGTCCTGCAGTTTGTGTGTCTTGATGTACTGCCACAGTGCCGAGATGATGATGGGCCTTGTCTGGGTATGCAGCCCCAGGAGGCGAGCCAGCCGGGGGTCCAACTTGAACTGAAGCGGTTGGTAGTCGAGCAACAGTAGAATTGTGCAGCGGACATTCTTGTCGCCGGGACGTTTCACCTGAAATCCGTCAGTCTCCTGTGTGGAGGGAGTGCGATGCCACTCGACGAGATGATTGTCTGGTCCATAGAGGTCCTTGTCTAGCTCGATCACCAACGACTTGAAAAACGACGAAAATTTGCGCTTCACCTTATTTGGGTCGTTTTTGGCGTCCTCCAGTAGCCGACCCTCAACTCTGAGCTCCCAGGAGGCAACACTCCCCTCTTCCTGAGGAGCCCCACCGCCATCTCCCCCTACTCCTCCCCCTGCCTCCTTGGCGGGGTAGAATGTGTTCGATATGAAGATGCGCAATTTCCGCTTCTGCTTCATCGGTCGTTTCAGAGCTTCCTGTATATCGAGCCGTTTGCGCATGATGGTGGAGTCGAGTTTCCGCTCGAAAGCCAACAGATCCATGTAGGCCTGCGACTCGGGCACCAGGTTGCGCACCTTTTGCGGCAGAATTTTGTCGGCCAACTTCTTCTTCTTCTTGCTGCTGCCACCCTGACAGTTGGCAGCACTGTTGTTGACTCNNNNNNNNNNNNNNNNNNNNNNNNNNGCACCACCCTTATTTTGCTGCGGTGACCCCCGACTATCATTGGGCCTCTTTCCGCCACCCTGCTGCCCCATGCCACCGCCTCTGGCCCCCATCGGACCGCCCCCGCTGCCTCCATAGGGGCCACCCCGCCCTGCCCCCTGCCGCCGGGGGGACCCCCAGCCCCTTGTGGCCCTCCTGCCCCGCTGCCGCCCGAGAAGCCCCCGGGGCGTTGTTGTAATGGAAAATTGGGTCCGGCATATTGTCTCAAGGGTGGA
>NlDm
ATGCCGATGCTTTTGAGCGAGTTTGACTCTGTTATCGAGGGAGAGATGAACATGAGCTTGCTGGGCGACCCGTTCACGCTGGAGTCGCTCAACGACATGCTCGCAGCCGACACGTTCGGTATGAACCGCGACTGGCTCCACCACGAGTGGGACAACTTGGACGAGTCCGCGCCCGAGTGTCACGACTCGTTCGACGATCGACTGTCGCACGACTGCATGTGGTACGGCACTTGCGACAGCGACTACCATCGCGAGAACAGGACGTTCCCCGAAACAAGGTTCATGGTGAAAACAAATAGTGTGAAAAGTGTCGCCGAGCCTTCAGTGAACAGCAGTAGTAATACGAGTAGGTGCGAGAACAATAGCAGTATCGCCGGTAGTTCGAGTGCCTCGATTGTCCCCAGCACCAGCAATGGTGTTGTGCGGACAGTCTTCAGTAGTAATAGTGTTAGTAAAGTTAGCAACGCCTGTGTGATCAATAGTAATAATGTTGTAAATAGTAGCATAAATAGTTCAGTTGGAAGCAGCAATAAAGTGATCATCAGTAACCCTCTGGTAGAAAGGACGAAGACTAGTGTGGCACAGAAGCAGACAATCCAGGTGCCTAGTGTGGGAGGGCCCCGCCGTGCCGGCGTCACCGTGCAGAAGACGGTGGCCCGCAGTCTGCTCATCAAGTCGACCAACCCACCTGCGATGCCTCCTGCCATCACTCGCCCCTGTTACCAGGCCGACTCCGAGGACGACCCCTGCCCCCTCGACCTCCCGCTGCAGTCCGTCCTGCTCAACAGCTTCTTGCTGGACAACATCAAGCCGCCTCAGGGCGACCTCTGGGACGACGTGATGGCAGCCGTTGAGGAGGAGACCGCCGCTGGCCTCAGCCCCGAGACGCCGCCTCCCTCCTCCAAGGCCTCCTCGGACAGCGAGAGCTGTGACGAGAACTCGCTGCAGCCACCGGCCTCCTTCCCCATGATTACACCGTCAGTCGTCGCTGCCGTCTCATCAGCCTCCTCGTCGACGAGGAGCTCCGCCTCAGACAGCCCTGCCTCTGTCGTCAACGATGATCACAGCTATCACAGCTCCGCCAAGTACCAATGGCAGCGTCGGATTGACGACCTTGGCGTCCAGACACCTTCTGATTCAGAGGAGGAAATCGACGTGGTATCGACATTCGAGCGCTCGTCGAACTGCAGCAGCGGCCGCTCGTCATCTTGCAGCTCTCCCGGCTCCTATTCCGATTCGTCATCGATGCCAGACAAGCGCCGTTTGGTGGCCGAATCGCAGGAGCTGCACCGGGCAGCCACCAAGCTGCTGTCTGAAGCGTCGCGCGCCGTCAGCAAGCGGCTCAGGCTGAAGATCACCACGACAGCCGCCGGCCCCAAGCCACGTGGCGCTCCCCGCGGTGCCCCACGCGGACGCCCGCCCACCAAGCGCCGTATCAGCGACGTCCTGGATGACGACAGCTCGTCGTCCGTCACTCGACTCCCCGCCAAGAAGGCCAAGGCCCACGGCGGCCGCTACAAGAAACCTCGCTATTCCGAGGAGTTCGGCGACCGGCGTCGTCTGCACAACAACATGGAGCGCATGAGGCGAGTCGACCTGAGGAACTCGTTCGAGGACCTGAGAGGCCTTGTGCCTAGTCTCATGAACAAGGAACGCGCTCCCAAGGTTCTCATCCTCCAGGATGCCGCCAACTACTGCACCGAGCTCAGGATCCAAAGCAAGCAGCTTTCCTGCGAGGTGTATGCGCTCAAGAAAGAGCAGGACCGCCTCAGGGCCACTGTCTCTCGCCTCAGACGCTCATTAGCAGCCCATCGCTAA
>NlUSF
ATGGAATCGGTACCTCAGATTGTATCAACTTCAAGTCCTACTTATTCAAATGCTTCCCAACAAACTAATGTACAGGCATTGTTGTCCAGTCAACTCAATGGTCAGTTCTATGTAATAGGATCTCCTCAAGATGTATTTTCTCCAACAAATCAAAGGTCTCTTTCTCCAAGAGCGACAAGGAATGAGAATGGGATAACCAGGACTACATCAACTAGAGATGATAAGAGACGAGCAACTCACAATGAAGTGGAAAGGCGGCGTAGGGATAAAATCAATAACTGGATAATGAACCTCAGTAAGATAATTCCTGATTGCGCTCAGGACACTTCTAAGGGCTTCGAAACACAGAGTAAGGGTGGCATTCTTGCAAAGGCGTGTGACTACATAACCGAACTGAAGCAGTCGAACACGCGTCTCCACGAGTACATGAAGGAGAACGAACAGCTGATTGCTGAACTGGAAATGGTTTCCAGGCAAATGGACTCGCTGAAACTGGAGAACCACCAACTAAGGGAACAGCTAGTACAGCATGGCATCATACCCAATTCAGATCCTCTTTCATAG
>NlMitif
ATGAGCTTTAGCGCCATACATGGAGAAGACAAGACAAAATCCAATTCAGAACTGATACTAAAGGCCAAGCCACACGAAGCGTTTTTCCAGGCTTTTTTAGATGTGTCGGCAAGGAAGAAAGCTCTCCGATTGGCTGATTATCAGCAGATACCCGAACGCCAACCGGAGAGCTTCCTCCCCAGTCGCCTCATCTGTAAACGCCTGGAAAAACGTTTAGTGTGGCTTGGCCCTTTGAGGTACACTGTATACTGTATAAATTATAAGGATTTGATTGATTGGGAAGAAAAAATAACTCCGAGAATATACATCTCAGAGCCAAGAGTGGAACTGCCGATAGCGGAGGAGTTCTTCGAAGATTTTCTATCAAATGTCGGAAACTCGATAAATCCTGAAAATCTCAAAACATCGCAATCTTTGACTCTACCCGATCTTGATGCGGATAACACAGAAATGTACATTGACCACCTGATCTCGCTGAACTCGGGATCCTCCGCCCCGGATCCAATCAAAGCCGAGCCTCCTCAATACTCGGAAGCCGACCTTCATGCCTTGGCAAAGGACCGTCAGAAAAAAGATAATCACAACATGATTGAACGAAGGAGAAGGTTCAACATAAATGATCGTATCAAGGAGCTTGGAACGCTTCTACCAAAGAACAATGAACAGTATTTTGAGGTAGTGAGAGACTTCCGACCCAATAAAGGAACGATTCTAAAATCTTCTGTTGAGTATATAAAAGCTCTGAAGCAAGAAGTCCAAAAACTGAAGCAAATGCAATTTAAAACCGTAGAGCTTGAGACTGAAAACGAGATACTTTGTAGTCGTGTAAAGATGCTGGAGAACTTGGCAAAATCACATGGTCTTCCTTTACCTGAATACTCGTGGCAGACCTCTTCAGAGAGTATTTCAAGCACTTCATTCCTGAAGAATAGCCTGGCAGCGTTGCGAAAGAGCACGGACTTGCTGTCTGAACTGAATCCCCTGTCTTCGGTGGATGATTTGATGGACGACGAACATGGAGTGGTCATGAGTGGGGGAGACGATCCCATGCTTAGCTCCAGTTCCCCCCTGCCCCACCTGCCTCTCCCGCCCTCCCCCCTGTCGTCGGACATCGATATGATGGTGCCCCCCGATCACTTATAA
>NlCrp1
ATGGTCAGTAGTGCAGCTGTTTGGCTGACGGGGGACCAGCACCAGCAGACCACCAGGGAGTCTGCTGGGATCTGGGAACGACGACCGGTCGGGAATTCGCGGAATGCTGGACCCCATGATGATGATGATGATGATGAGGCAGCAATGCAGTCATGTGGACCCCTTCGCCCCTCCCACACGCGCATCCGCGAACACTTTTCAACATACCGCACTGTCGATGGTTCACACGATTCGCGTGCGGCCATACTGCAACAGACAGCCGAATACATCTACCAGCTGGAGCAGGAGAAGACACGCCTGCTGTCACAGAACTGCCAGCTGAAGAGGCTCATCAACCAGCATGAGGGAGAGGCCACGGCGCCTAAGAAGAGGAAGACTGAAGCAGGAGTGGTAGTGATGACGCCGAACGACACCGCGGACCCAGAAAGTGTGGCAGCGCTCCTGACACCCGAACCACTCGCCATGGTGACAACATCCGGCTCCGCCCCGACCATCATCACCGCCATGGACGTGAGCGATAGCGGCGCGACAGTCGCAGCGACAGGTGGTGCGACAGGTGCAGCCGCCAACAGCGATCTCATTGAGTTGCGCAGTATGTTGGACCGTGAGCGCGGTCTGCGCATGATCCTGGAGGACCAGGTGCGCTCGCTGGAGACGCAGCTCTATCCCGAACGCATCCGCGAGATCACGCACCAGGTGCAGCTGCAGTATCAGCAGCGCGATGAAGAGGAAATGCAACCAGCGGTGATCACGCCGATCAGGCGGGAGTCGGGCTCAAGCACGGCGTCGGACACGCCGCGACTCACCATCCTGGAGGCGGCCATCAAGGCCGAGCCCAAGGTCGAGGTCGAGAGGATCCCGTCGCCCAGCTCGCCGGCCGCCAGTGGTGACGAGCTCACACAAGCTAGGGTGTACCTGGCGAGCACATCGCGACAGAACCTGGAGACGATAGTGGAGGCGATCAGGCACCTGGAGGGCGACGCGCTGTTCAGTAACGAGGAAGGTGGAGCGGCGGCTAAGGTGGCGGTGCGGGGGCAGCGGTTGACGGCCAC
>NlCrp2
ATGTGCGTTGAAATAAAAAAGAGCTCGTCACTGGCCGACGTATGCGATTATGGCATGCGAGATGAAGACTTTGATAATAAGTGCATTCGTTTCGGAAGTTTGAGTGGCGGCGAGCGGCCGGAGTCGCCCCTTAGCGGGGCGCGAGGTGCCGTCATGGAGCAGGAGAAGCGTATTCGACGTGAGATCGCCAACTCGAACGAGAGGCGTCGCATGCAGTCCATCAACGCCGGATTCCAGTCGCTGAGGACGCTTCTGCCGCATCATGAGGGCGAGAAACTCAGCAAGCTGTGCGAGGGAAGAGAAGCGAAACAGCTGAGCAGTCTGTGCTGGGGGGTTGGGACTTGTGGCCCGAATACCACATTCACTCGCTCTCTCTCTCACTCGCTCTTTGGTCGGTGGCGGCGACGACTATTGATCGTGGCAAATTTCGGGGGCAAGGATACGCACCGGGGCAATAACCGGGTGGCTGAACCCCCCAACCACACCCTGAGCATCCCCCCTTTGAGGCTTGCCGTCGCCGAGGAAAAATTTGCCAACTCCAGAGGCATCCTGCAATCTGCTGCCGGGTTCGCTCCCCCATACCCTGGCTCAGTGATTGGGTTATTGGGCCCCTGCGTTACAGCCTAG
>NlBmx
TATTCGCGATCGAGTAGTGCCGGCTCACTGCACACACACCACAACGCAGGCGGAAACATGAGCAGCAGTAGTGGACACGAAGACGATGACAGTGACAACAAGGGCACAGCGTTGTCGTACAAAGAGAGACGGCGAGAGGCGCACACGCAGGCAGAGCAAAAGAGACGGGATGCCATCAAGAAGGGGTATGACTCGCTGCAGGACCTGGTGCCCACTTGCCAGCAGACTGACGCCTCCGGCTACAAGCTCAGCAAGGCCACTGTCCTACAGAAGTCCATCGACTATATACAGTTTCTGCTGCAGCAAAAGAAGAAGCAGGAGGAGGAGAGGAATTCGTTGAGGAAAGAGGTGGTGGCGCTGAGGATCATGCAGTCCAACTACGAGCAGATGGTGAAGGCACAGCAGACGCAGCAAGGCCACACCCAAGCCACAGTCTCTGACGAGCTCAAGTTTCAAGTGTTCCAAAACATTGTGGATCAGTTGTTCATCTCCTTCAGCAGTATATCTGTCACTAATTTCGCAGAATTATCAGCATGTGTCTTCAGTTGGCTGGAAGAGCATTGCAAACCTCAGGTAATGATGTATTTGCTTTCC
>NlMlx
ATGGCTGAAACATTGAAAAGTTTTGAAACTAGGATTAACCCGAAGCCTCTTGAGAAGGAGACAATCCATTCGGGACATTTCATGGTTTCAAAATTTGAAGCTGAAGAGCCAGATGATGACGATGATGTTGCTGTGCCTGTTCCGGATGCTATGCTAAATAAGGCCAATATGAATTTACAAGCGGTTACAAGTGTTACGGCTGTTCGCTCTAGTACAAGTAAAATAGTCAATATTCCGGGACAAACCATAGCTATAGAGACTTCTTTAGCCAAACTTTTCCAGTGCATGTCTTTAGCTTACAGACAAAAATTGACTTCACCCAAATGGAACAGGTTCAAAGGAATAAAATTGAGATGGAAAGACAAGATACGATTGAACAATGTCATTTGGAGATGTTGGCATATGCAGTTCATCACCAAGAAGAACTCCTTAGTGTGCCAGTTTGCCTCACCACTGGATGTGGACACTCACAACAAGCCAGAGGCGGTAGTTCTGGAGGGAAAGTATTGGAAGAGGAAGCTGAATGCTGTGACTGCAGAGTACAAAAAATGGAGGATGTTCGCTCGAAATCAGGTGATGGGTTGGGGGCCCAAAGATGCTCAAGATGTGCTTTCGGAGATGGACCTACTGGGCTGGCAGCCTCACAGCAACGACTGCAGCCACATGATGGTGGATGAGGACTACATGGAGTTCATGTCGGACACTCTCTTCTCATCAATTGCGGCTCAACCGTTCGCCTTCCCTGATCCCAGAGAAATTGAAGAGAAAGACAATCACATAGATTGTCCGTTCGAAAATCGCCAGAATCCAGAGGCAGAAGCGCCGTGCTACAGCCGTGCTATGCTGAATGTGTTGCATGCAAGATGTCATACGTTCGGATGTCAGGCCCACGACAAACACAAATCCTACTGGCAGCGACTTTTCAATTCTGGACCACAGACTCGGGGGGGAGCTGGCCTATGGGCTGACCTAATTCAACCCAGTCTGGTGCAGCTACAGCCAAACCTTGACGATGATGTTATGGACACATTTGAACCTCTGCATGCTCGGGGGGGAGCTGGCCTATGGGCTGACCTAATTCAACCCAGTCTGGTGCAGCTACAGCCAAACCTTGACGATGATGTTATGGACACATTTGAACCTCTGCATGACTTGCTGTGCTCCAAACTGCCGCCAGTCCCTGAAGAGATAAGCACGGGTACAGCGTCAGACAGCAGCATACAGGATCTGTACAGGGCTCTGAATGGCACCTACCAGGACATGACCTCTGAGCCACCCCCTCCACCTCCACCCCTTCCCTCTCCCAAACCTCTGGCAGGCCGAAACTCCTCTCTGTATCGACCTGTTGTTAAACAGGAGCCGCAGTACCCCTCATACCAGTATGCATCGCAACCGGTTGCCAGTCCGCGAACGTCGACATACAAACCCTACATGCCTTTGACCTACAATATGCCAACACAACAACCACAACACCAGTCTGTCACACATTATCAACAGCTGTCACCCCCTCCACCTCCGCCGCCTCTACCCCCTCCACCAGCCCAAGCGCCGGCGGCAACTTGCATCCAATCAGCGCCGAGCCCGCCAGAATTCAAATTGCCATCGACTCCGCCTCCGTCGGCAGCTGCAGCCTATCCGTGCAGCCTGTCTTCCCTGCAACGCACCAATATGCGCTCGAATAGTCTGCCCCTGTGCGACAAGCCTATGCCGCAGAGACGGGCTACCGAGCAAGTGTTCGCTATACCTAAGTTAAAACACCGCAATCGGTCCCGCAGTGGCTCCCGTCTGATGACACCGGGCAAGTCATCGACGCCGACTCTCATCTCAGCCGGAAGTGATCCCGCCCTCAACACCACTCAGGCGCCAAATGCCTTACTGCATCAACTCCTCACAACAAACAATAACAACTGCAACACAGCGACCAACTACAGCTACAGAGGAGTGAGTGCGTCGAGTCCGTTGATCGACAAGAGCCTGGCTGATAGCATGGGGGGCCCCGCAATGGCAGCTGGCAGCCCTGTCGCCTCATACAGCGGCTACACTCACACTCAGAGCTCGGCAGCTGTGCATATCATCAACACCAACACAGACTCCAATGATGGCGTCGAACACATTATGCCTGACAATACGCCCGTTATGTACTCTAGTCATAGTCCCAGTGACACATTCACATTCTCTGCCAATGTGACAACAGGTGCGTTATCCAGGAGGATGGCCACGAATCAGCAAATGCCGACAATTTTGTCACAGTCACCCTCTTCTACTATTGTGGTCAACTCGCCGTCTCCACTATCAATCTCAGCGGAGCATTCACCACAGATGGTTGGCAGTGCATCGAACAGTCCGAAACACCCGGATTCGCCAGGAAATGATAGTCTCAGTCTGTCTCCTCTGAATGTCGGCAGTCCGAACTCTCCAAATTCCAAGAGCGGAAGACGGACATATAAGGAGCACCGAAGGGTCTGTCACATCAACGCTGAGCAGAAGCGACGCTGCACCATCAAGAATGGATTCGACACCCTCCATGCCCTCATTCCGCAGCTCAACCACAACCCAAATGCCAAGCTGAGTAAAGCGGCAATGCTTCAGAAAGGAGCTGAATACATTAGGCAGCTGAGGAACGAAAGAAATCAGCTGAAAGAGGAAATGGACAGTCTTCGTCAGCAGGTTGAGTGCCTCAATTCAGCAATTAGCAATTGCCAGTCAATGTTACCAGCTACTGGAGCTCCCGTCTCCAGACACAGAACAAGCCGAATGAAGGAAATGTACAACGAGTATATTCGCTCAAGAACTCAAGAGAATTGGAGGTTTTGGCTGCTGAGCCTGATTTGTGAGCCACTGCTGGTCTCGTTCAACAACACAGTCTCCACTGCCAGCCTTGACGATCTCTACAGAACCACGTTGATTTGGGTCGAGCAGCATTGCTCGCTCGTTGATCTACGGCCTGTTGTATTGAATGCATTGAGGCATCTGTGTACATCGACTGAATTCTTGTCGGATCCTACCAAGCTGCCTTCAGAAGCTCAAGCTGCTGCCATCAAATCACACAGCTCAAACTCCTCCTAG
>NlSREBP1
ATGGCAGAATCAAATTCTGAAGGTTGGAAAAGTTTTAATTCTAATGATAGTGGAATGGAGGCTGATTTTAAAATTGACGGACAGGATTACTTCAACGACAATGACTTGGGATTATCAGTTTCAGGACTTGACGGCATACCTTTGGTTCTGGACCCAGACAAGATAGCAATAAAAGATTTCCATGCTAAGCAAGAAAAAAAGCCAAAAAAGAGTTCCCATAATGCCATTGAACGACGTTACAGAACTAGCATCAATGATAAAATCATTGAACTCAAGGATATCGTTTGTGGACCAACAGCAAAATTGAACAAATCAGCGATCCTGAAGAAAGCGATCGACTACATCTGTTTCCTGAAGTCTTCAAACGAGAAGCTGCGGGAGGAAAACATGTCGCTGAAAATGAACGCCAAACGCCAGTCGCTGCGTGACCTGTTGGCACCGTACTCTGTTGCGCATGCGCACCACAAGGAGGAGGCAATCAGTGTAGGCGCCATCACTCCGCCGCGGTCGGATCCCTCCTCGTCGCCTCCTCACACCGACAGCTCGCAGCCCGCGTCGCCTGAGGAGTCGCTCTATCTCTCACAAGAGATGAAGGAAGAACCAGAAGGCGCCCTGAAAGGAATGCTGGACCACACGAGGATGACGCTGTGCATGTTCATGTTGTCAGTGATTGTTTTCAATCCGCTGGGTAAAGTGGTGGACAGACTGCAGAGCAGCAGTTCCATGTTTGATGATGGATTTGCTTCGTCTAGTGGCGCGGGACGCACTATTTTGAATTTCACCGGTGACGAGAATAACTTATGGGGCTGGACTTTTGGCTCATCTCTCATGATGTGGCTTGTCAACTCGTTAATTCTGGCCGTGTGTCTGATAAAGATGCTCGTCTATGGCGATCCAGTCTTGAGCAGTGACTCGAAAGCATCGGTGGCATTCTGGAGACATAGGAAGCAAGCTGATTTCGACATTAAAAAGGTATTCTCCATGCTTTATTCATTCACAAACTTTTCAAATTATTATACCGCGTCTACATGTTGGCCCAGCCTGGTAACCCAATTTGAGCAAATGAAGGCCAGCGCTGGTAAACCACCTATCCACTAG
>NlSREBP2
ATGGCAGAATCAAATTCTGAAGGTTGGAAAAGTTTTAATTCTAATGATAGTGGAATGGAGGCTGATTTTAAAATTGACGGACAGGATTACTTCAACGACAATGACTTGGGATTATCAGTTTCAGGACTTGACGACATAATGTCAAACTATGAGTCAGAGCTGCTGTTCTCGAAAGACGAAACCCTATTTCAAGATGATTATCTCTTGGAAAACTCTATGCCGTTAGATAAAGAATACTATGACTATGATTTTTTGAGTTTGCCAAACACCATAAGAAATGCAACGCAGCCGGATTCAATTCCTCGGAAGTCGCTGGAAGAGCCTTTTCCAGTGGGACTGGCGCCCCAGAATACCACTTCAAATCATATGAGCAAAAATTTGCAGCTAGCTTCGGGCACATCCACACCAGTGTTGAGCGTGCAACCGTCGACGACTGTACCGCTCATCCATCAGACCGTCCCTGACCGCCCCACACTACAGTCCTCCTCTGCCCCAACCCCCTCACTAATCCATCAGACCGTCCCTGATACCCCCTCTTCCACCCCTACCGTAGTGCTGCCTCCAGGTTTCATTTTCCCTGCCTCATCATACCAGAGTCAACCGCTGCAGATCATTCAGACCAGCAATGTGGTGACTGCGCATGCGCCGCACGGACAGCTGGTGACTGCACATGCGCCGCAAGGACAGCTGGTGACTGCGCATGCGCCGAGCGGACAACAGGCGGTGTATGCTGGTGCTACGTTGCAGCCAAAGCGGAAAGCGGGTAGCAAACGAGCAAGCCAACCGTACATCACTGTTGGACAGATTCATGTGCCGTCTGATCAGATGAAACAGGTTCTCCTGCAAGCTCAGTTGATGAATTCTGACAAGAGTCCGGTTAAACAGCCGACAGTTATGTACGCCACTACTGCGCCACAACTCCCCAATTTCCTGCCTTCTTCAACCACAACCGACAAAATGATTTCCCAAGAGAAAGGATTCGCCACTTTGAATAATACGCTACTTACTACAGGCATACCTTTGGTTCTGGACCCAGACAAGATAGCAATAAAAGATTTCCATGCTAAGCAAGAAAAAAAGCCAAAAAAGAGTTCCCATAATGCCATTGAACGACGTTACAGAACTAGCATCAATGATAAAATCATTGAACTCAAGGATATCGTTTGTGGACCAACAGCAAAATTGAACAAATCAGCGATCCTGAAGAAAGCGATCGACTACATCTGTTTCCTGAAGTCTTCAAACGAGAAGCTGCGGGAGGAAAACATGTCGCTGAAAATGAACGCCAAACGCCAGTCGCTGCGTGACCTGTTGGCACCGTACTCTGTTGCGCATGCGCACCACAAGGAGGAGGCAATCAGTGTAGGCGCCATCACTCCGCCGCGGTCGGATCCCTCCTCGTCGCCTCCTCACACCGACAGCTCGCAGCCCGCGTCGCCTGAGGAGTCGCTCTATCTCTCACAAGAGATGAAGGAAGAACCAGAAGGCGCCCTGAAAGGAATGCTGGACCACACGAGGATGACGCTGTGCATGTTCATGTTGTCAGTGATTGTTTTCAATCCGCTGGGTAAAGTGGTGGACAGACTGCAGAGCAGCAGTTCCATGTTTGATGATGGATTTGCTTCGTCTAGTGGCGCGGGACGCACTATTTTGAATTTCACCGGTGACGAGAATAACTTATGGGGCTGGACTTTTGGCTCATCTCTCATGATGTGGCTTGTCAACTCGTTAATTCTGGCCGTGTGTCTGATAAAGATGCTCGTCTATGGCGATCCAGTCTTGAGCAGTGACTCGAAAGCATCGGTGGCATTCTGGAGACATAGGAAGCAAGCTGATTTCGACATTAAAAAGGATACACCACCGTCAAAGTCAGACACATCCATCCTAGCACTAAAAATCAGTCTTGTTTTGGCGGTGGCTAGTTTTGTCGTTCTTGTGCTGAAAAAGAAGTGTCTTGTTTTGGCGGGGCGAGTCCGTGACTAA
>NlSREBP3
ATGAGATCCCCTTCTCTTCATTGCCCTGCTCGCTGCGCCGCGTCTCGTCGGCAATCTAAACCTCTTGTCCATTTTTCCGCATCTCGAATAGAACGACGCGCCACACTGCTGAAGGAGCAGACCGACCTCGTCGCCGCACGCCGCTCGGCGCTTCCTACCTGCCTTCAGCACCGGGTGGAGCTCTCGAGCTCCTCTTGCATTGCCCAGCTTTCCATGGCCGACGACAAGTCCACGGGTCGTTTTGGTCTCGACGAGCCCGTCTTTGGCTTCATGAATGATTCCTCCAACGTGCCTGACGCCAACTCAAACCCCCCCCGCGTCCATTCCGACTCCAACGCCCAAAGCTTCTATGCCTCCTCATGGGACTTCCAAGTTCACCCCCCCTCATTTGACTCTTTTCACGTCGGCTCCTCGACCAATCCGCCCCACGTCTCAACTGAGCCGATGGCTGCATCCTGGTCGCTGCCTTTTGATACATCACAACGGCAACGGCAGCCCGTGGCTCAGCTTCAAGAGCCATCATCTTCATTTGATACCTTCTCGTCATCTAATGTGCACCTAACGTCCGTCTTTGCCTCATCGCAGCGCAATGCCTGTGCCAGTATCGCCGGCCAAGCCCATACCGCACCCGCTCTGTCACATGAGGAACTGCGCAATATCGCCATGCCACCGCATCTGCAATATAACTCGCCCAAGAGCGCCTCTAGTCCCGATTCGGCGAACAGTGAAGTCAAAGCTGGAGCTGTCTCCTCGCCTGACTTGATTGGTCTTACTAAAAAAGACGTGCGGAAACGCAAAATGCCTGACGAGCTAGAGGATGACGATGATGCCGAAGAAGGGGACAAGCCAGTCAAGAAGACTGCACACAACATGATCGAAAAGAGATATCGGACCAACATCAATGACAAAATCGCTGCTTTGCGTGACAGCGTTCCCAGCCTGAGGATAATGTCGAAGAGCGCCAGGGGCGAGGACACGACCGAGGATCGCGAAGAACTCCACGGCTTGACTCCTGCGCACAAACTAAACAAGGCGACCGTCCTAAGCAAAGCCACCGAGTATATTCGGCATCTCGAGAAGCGTAATAGCCGACTCTTGGACGAGAACAATGCCATGAAAGAGAGAATCGCTGCGTTCGAAAAGCTGTTCATGGCTGGCGCCATGAACGGCGCCATGAGCCCGATCCAGCAACAGCCGAGTCCGATGCAATACCCCCCTGACGGTCAGACTCAATTTTCCAACTCGCCCTTGGGTACACCACAAGAGAGCAGCCCGAACCCTGCCGGCTTGATCAACGTCTCGGAGGACATGAAGCGCATCATTTCGGCGCAGATGGCCGGTCAACCTTATCCTGTGCCCCAGCAACCGTTCCGAAGCAGCAACAATCCCGCCATCATTCGACAGCAACAAATCCAACAGCAGCAGCAGCAGCAGATGCAACCAAACGGTTGGGTCAACGCGAGCCCTTATTTCGGGAAACTCATGGTCGGCTCCCTGGCCGGCCTCATGATTCTCGAATCCGTTCGGGAAAGTGAATTGTCCAACGACGACACCAAGGGTAGAGGGCTCTTCGCCCTACCTCTGCAGCTCATCGGACGTCTGTCATCGACTTTGGACCTCGATGTCATGGGTTACCACGTCCACACCTCCCTCAAATTGCTTTTGTTTTTGTGTACCCTCATGTGGGCCTTTGTGCCTTGGCTCTTTTCGCCGTCGGGCAAGAAGCCGACGCAGCAGGCGGCTGTACCCAAGCAAGCGCCGTCTTTGGCTTCGCCGATTCACGTGCGGCGCCAAGCCTGGCTGACGGCCATCCAGACTGTTTGGGTGCCTCGGCATAATTTTTTCTTGGAGGTATCTGCGTTGATATTGAAAGCTTGCAAGCTGAGCCTGCGCAACGCAATCGGTGTGCACGGTTACCAGCTGCTGACAGGGCTGACAGAAGAGCAAGAAACCGCCCGAGTCAAGGCATGGTCCATTGCCCTTGATTCTCAGCTCGCCGGCGGCGACGTCGACATTTGCAAGAGCCGGCTCGTCCTGACCCTGCTCGCGTCCGGAACATTACCCGATACACCGGCCCGCTTAATGCTCAAAGCTCTACACATCCGCATCCTCCTGTGGGACTTGAACAACGGCAGGTGGCAGCTCGGTATCATCAACACAATCGCCGCCAAACTTGCGAGGAAGCGATGGAACGAAGCGCGGCAACTGAATCGTCTTCTTGTCCAGCTCCAACGCGGAACTGCGAAACAAGACGAGCATGAGCTTCCCGAGCATCTCGCCGCACTAGTGGAGCAGGAGTACGATGAGGTCCTCAGCTTGCCCGTTGTGCAAAGGGCGCACAACCTGGCCTTTAATATTGAAACATCACATGAGATCCACAGCCGCGTAGACGACATGGATGCCGTGGTCGACGACACGGCCATTGGCTCGCCCATGGATGCTGTTGCAGCTTTGTGGTCGACTCAGGTACTGCATCGCGTCCTCGTGGCCACGCTGGATGACGACGCCCCGGCGCTGCAAAGGCGATCCAAGGACATCGAGCAAGCTTTCAAGGTGGCCCCAATCGGCTCCCTTGCCCAGACCCGGGCTGCACTGGCCCGCGCGGTCTTTGTGGGCAAGTGCCGCTCAGAAGACATCGACCTGGCTCGCAAGGCGATGGCCCAGGCAGAGGTGGATGACTCGATGAGTAGCAGCAGCAGTTCGGACCCGTCGTTGGAGCCCGTCTCGCCCAAACTCGATCAAGACATCGGCATGCCGCTCAGCTGCGCCGTGGCCATGATGCGGCTCGGAGATGGCGATGGTTTGCTTGATGTCGATCTCTCGGTCAAACTTTCCCGGTCGGACCTGGTGCCATCGATGACGCTGCTGGGATTCACGGTAATGATGGAGCTGATGAAGCAGCTATTGGACCAGGAAGAGGAAGAGTTGGGCGTGGCGGCCGAATCGATTCTGCAAATCCTTGCAAGCAGCCTCCGACTATGGATGGGCAGGCCATACGCGGCAAAGTGTGGTGTCAGCTGCCGACTTCGCAACAAGGTGGTTAAGAAATGCCTCGCGGCGACCAAATTGCTGGCCGGGCGTGACACCGACACGGGATACGGCAGCTTGAGCAAATGTGAGCACGATGTCGATTGA
>NlTai
ATGACCGCGCCCTTACTTCGATCGGCAGTCGGCTGTGCTCGCGTGCCAACTCATCTGCATACATGGCTATTATGTCAGCACAGCAAGTGCCTTAATGAAAAGAAAAGGCGGCAGCAGGAAAACCACCACATCGAAGACTTGGCCGTCCTCCTGCAGCACGAGGGAGAGATGAACTCTCTCTCTGTCAAGCCAGACAAGTGCGCCATTCTTGAATGTACCGTCAAACAGATTGGAAAAATTCAAGAGAACTCGTCAGGAGACGCAGTGCAACAAGCTGATGTGTCATCTTCGAAGCCAACCATTCTACCTAACGACTATTTCGGCAATCTCCTCCTAGAAGTATTTATCAAACAAGTAAAATTTATTTATAGAATATCTGAGTACTACCTTGGACTACCTACTAATCACAAAACTTAA
>NlClk
ATGCCGGATGGATTGACGGATTTTGGCGGGAATGATGTGTTGGTGATTCAAGGGGGTACCAATGACGTCAGTAGAAATGAAGCCAAGGACGTTCTGATTGCTTTACGAAGGAGTCTGGTGGCTCTCTATGGAACCAACGTCGTCGTGATCTCGATTCCACATCGCTTCGATTTGGCGGACTGGTCTTGCGTCAACAAACTGATTAAAGAGACTAATATTGCTATTAAGAAAATATGTAATCTGTTTCCTAATTGTCTGAATATAAAGAGACGCCGTCCATCCAGGAAGCTGGTCATTGACGAAGGACTGAATGACACGATGGACGATGATACCGATGATAAAGATGATACTAAAAGAAAATCACGAAACTTGAGTGAGAAAAAACGTAGGGACCAATTCAATATGCTTATCAACGAGTTGAGCTCAATGGTATCAACCAACAGCCGCAAGATGGATAAATCCACTGTATTGAAATCAACAATTGCTTTTCTGAAAAATCATAACGAAATTGCTGTAAGATCAAGTGTAAACGAAATTCAAGAGGAGTGGAAGCCTTCATTCCTATCCAATGAAGAATTCGCACACTTAATATTAGAGGCTCTTGACGGCTTTATCATGGTATTCTCTTCTTCGGGACGAATATTGTATGCATCAGAAAGTATAACGTCGCTTCTTGGACACTTACCAAATGACCTTCTTAATACGACAATTTATGACATTATATTTGATTATGATCATTCAGAACTGTATAACATTCTTCTGAATCCAACAACCAACGTGCAGTATGACCAGACCAAAGGTTAG
>NlDys
AGGTTCGACACGAACAAGTCGACAAAGGGCGCAAGCAAACTGCGCCGGGACCTGATCAACGCGGAGATCACGAACCTAAGGGACCTGCTGCCCCTTCCCCCCTCCACCCGACAGCGTCTTTCGCAGTTACAGCTGATGGCGCTTGTCTGCGTCTATGTGCGCAAGGCCAACTACTTCCAGTCGCAGTTACAGCTGATGGCGCTTGTCTGCGTCTATGTGCGCAAGGCCAACTACTTCCAGGATCGTCATCGTCATCGTCATCGTCATCATCATCATCAT
>NlSs
ATGAATGGCCTGACTTACTCACGTGCAGTTGTTAATGTCACACGTGCCGCGACCGGCAAACTACTATCACGCACATTCGTGAGCGACGCCATTTACTGCATTTCTGCTCTATTTGTGCACTGTGCACTCCTGAAACCACCGCCGAAAGACGGTGTAACGAAGAGCAACCCTAGCAAACGGCACCGCGAGCGACTAAACGCCGAGTTGGACACCCTTGCCAATCTCCTTCCCTTCGAACAGAACATTCTCTCCAAACTCGACCGTCTCTCCATTCTCCGTCTCTCAGTCAGTTACCTTCGCACCAAGAGCTACTTCCAAGACGGTGTAACGAAGAGCAACCCTAGCAAACGGCACCGCGAGCGACTAAACGCCGAATTGGACACCCTTGCCAATCTCCTTCCCTTCGAACAGAACATCCTCTCCAAGCTCGACCGTCTCTCCATTCTCCGTCTCTCAGTCAGTTACCTTCGCACCAAGAGCTACTTCCAAGGTAAACGAACACCATTTTACTAA
>NlSim1
ATGCTGGCAGGGGTGGGACACGTCATGCAACTTACTCATTATCTGTGCCAGTTCATAGAACTGTTCTATGAGCTTTACTACTTCCAGGTCATATTAAGACTGCTCGACAGTCATCGCCGGTTCAATGCGGCTGTTGTGGCGTGGATCAGGGTGGAGGGCTTGGCTGGGCGGTTTTTCTATATTCTTCAGAAATGCATGAAAGAGAAAAGCAAGAATGCAGCGAGGAGTAGAAGAGAGAAAGAGAATGCTGAATTTCTGGAGTTGGCCAAACTGCTTCCTCTGCCGGCAGCCATCACCTCTCAGCTGGACAAGGCCTCCATAATCCGACTCACTACCAGCTACCTCAAAATGAGACACGTTTTTCCTGATGGTCTGGGAGACGCTTGGGGAGCAAGCCCTCCTCCCCCTCCCTCGCGAGAAGCTTGCATAAAAGAACTAGGCTCTCATCTACTCCAGACGCTGGATGGTTTCATTTTTGTGGTGGCACCGGATGGGAAAATAATGTACATATCAGAGACCGCTTCCGTGCATCTTGGTTTATCACAGGTTGAACTGACCGGCAACAGTATGTTTGAATACATTCACCCAGCTGATCACGAAGAAATGACGTCAGTGTTAACCCTTCATCAACCACTCATGCCTCCTCACAATCACCTAGTTCACGAATTTGAAGTGGAGCGTGCATTTTTCTTGAGAATGAAATGCGTCCTGGCGAAAAGGAATGCAGGCCTCACAACAGCTGGTTATAAGGTAATCCACTGTTCGGGCTACTTGAAGGTGAAACAATACTCGTTGGACCCGGGTGCACCCTACGAGTCGTGCTACCAGAACGTGGGCCTCGTGGCAGTGGGGCACTCCCTCCCCCCCAGCGCCATCACCGAAATCAAACTGCACACCAACATGTTCATGTTCCGTGCCTCACTCGATCTCAAACTCATTTTTCTTGATGCCAGAGTTTCACAACTAACAGGCTATGAACCCCAAGACTTGATAGAGAAGACTTTATACCATTACATACATGGCTGTGATATGCTACACATGCGTTACTCGCATCACACATTACTGTGCAAAGGGCAGGTGACGACGAAATACTTCCGCTTCATGGCTAAGGGCGGAGGGTGGGTGTGGATGCAAAGCTATGCCACAATTGTGCACAACAGCAGGTCCTCAAGGCCACACTGTATTGTCAGTGTCAACTATGTTCTCAGTGACCACGAAGCCAGTGACCTTGTGCTAACCACGTGTGGTACGGAGGAGGGTGTGGAGAACGGGAATGGGGTGAATGTGGGAACGGGGAGCGAGCCTCTGCTGACATCGACCAAGCGGAAGTTGCAGGAGACCATCGGCAGGACCCCTCGCCAGGCGCCCCCCAAGTACCCCCGTTTGGAGGAGGACTACAGCGACTGCAGTGGGGGGCTCTATCAGGACTATGCTAGTCCGTCCTCGCACGAGCTGGTCCCCCTAGTGCCGCAACAACTCGCCCCCGCTTATCCGGACGACTACCCTGCCTACCCCGACCTCTTCTACCCCTACCAGGACCCCCCATCCAACCTAGTGCGCCCGTTCTCCAGCTCCAGCTCGAGTGACTCCAGCAGTCTGGACAACTCGGACCATTCGCACGCGCATGTGCAGATGACAACTGCAGCCAACTCATGCTCACTCAACAACCACCATCATCACCATCATCATCATCATCATGTGGCGAATCACTATCACAATCACAACCCTGTGGGCGCAGCGCAGTTTCAGCCAGAACCCATCACGGCTGGATACACCAGTGTCATTGTCGACTCACAGCAGTATGTCAACGATTATGTTCACTAG
>NlSim2
ATGGTGAGGAGCAACGGTAAGAAGCAGGAAACTCCCACACAAAAGGCAGGCATGAAAGAGAAAAGCAAGAATGCAGCGAGGAGTAGAAGAGAGAAAGAGAATGCTGAATTTCTGGAGTTGGCCAAACTGCTTCCTCTGCCGGCAGCCATCACCTCTCAGCTGGACAAGGCCTCCATAATCCGACTCACTACCAGCTACCTCAAAATGAGACACGTTTTTCCTGATGGTCTGGGAGACGCTTGGGGAGCAAGCCCTCCTCCCCCTCCCTCGAGAGAAGCTTGCATAAAAGAACTAGGCTCTCATCTACTCCAGACGCTGGATGGTTTCATTTTTGTGGTGGCACCGGATGGGAAAATAATGTACATATCAGAGACCGCTTCCGTGCATCTTGGTTTATCACAGGTTGAACTGACCGGCAACAGTATGTTTGAATACATTCACCCAGCTGATCACGAAGAAATGACGTCAGTGTTAACCCTTCATCAACCACTCATGCCTCCTCACAATCACCTAGTTCACGAATTTGAAGTGGAGCGTGCATTTTTCTTGAGAATGAAATGCGTCCTAGCGAAAAGGAATGCAGGCCTCACAACAGCTGGTTATAAGGTAAGAAAACTTGAAAAATTATCTCCAAGAAAAAATTGTCATCTAATCGACTTGATTCAAGTTTAA
>NlTrh
ATGCTGCCGTACCAGGCCGTGGCAATGGACTATGCCGTCAACTCGTCGCTGCAACGGGGTCTGAGCGGACCCCATCCTCACACACACCCGCACCCGCACTCGGCGTTCACGCACTCCTGGTTGGCCCATAGATCTGAAGCGTTATACTCACAATCAGCACCTACAGTTTGCTGGCAGTTTCGTGATCGAAACTGCAAGGTTCGCGCCTCACCGATTGGCATGGACGTTGAACGTTTAATCATCACATCAATCACCCACGCATTTCCTATCACCACGCACATGCAAAAAGCTTATATTGGAATCGAGAAGGAGAAGAAGGAGAAGAAGGAGAAGAAGGAGAAGAAGGAGAAAAAGAAGAAAAAGGAGAAGAAGGAGAAGAAGGAGAAGAAGGAGAAGAAGGAGAAGAAGGAGAAGAAGGAGAAGAAGGAGAAGAAGGAGAAGAAGGAGAAGAAGGAGAAGAAGGAGAAGAATAAGAAGGAGAAGAGGGAGAAGAAGGAGAAGGAGGAGAGGAGCATTTTGGAGCTGCGAAAGGAGAAGAGTAGAGACGCGGCGCGATCGCGTCGAGGCAAGGAGAACTTCGAATTCTACGAGCTGGCCAAGATGCTGCCCCTCCCCGCCGCCATCACCTCGCAGCTGGACAAGGCCTCCATCATCCGACTCACCATCTCCTACCTCAAACTGCGCGACTTCTCCGGCAACGGGGACCCGCCCTGGAGTCGTGACGGGCCGCCAGCTGCCAAATCGCTCAAAGTAATCATATCATTTCATTCGTAG
>NlSima
ATGTGGCTGTGTAATGGGGCCTTTATTACGCCGAATACTGTGATTTATTTTGATAATGAAGTTTTGTGTGGTGTGTTTAGGAACTCGGAGCGGCGCAAAGAGCGGTCACGAGACGCGGCGAGATGTCGACGCAGCCGCGAAACGGAGATCTTCACAGACCTGGCGCACGCCCTTCCCCTCCTCCCAACCACCAATGCCTCCCACCTCGACAAGGCGTCCATCATGCGCCTGGCCATCGCCTATCTGCGCGTAAGATCCATCATCAAACACATTCCAGAAGAAGTTTCAAAAGAAGAAGGCGATCCAGAATCGTTATACCTGAAAGCTCTGGATGGTTTCTTGCTGGTCGTTTCTTCAGAGGGAGACATCGTGTTCTTATCAGAGAATGTTACCAATTATCTAGGATTGACTCAGATGGAGTTGATGGGACAAAGCATTTACGAAGTGAGTCATCCGTGTGACCACAGCGAAATCAAAGAAATATTGGCGACCAAGAAAGAATCCGCATCCCTTCAGCATTCATTTCTGCTGCGTCTGAAGTGCACGCTCACTAGTAAAGGCAGGAATGTCAATCTCAAATCAGCATCATACAAGTCTTGTAAGGCTACCTTGAAAACCGACAAAGATGCTACGAAGATTGAAGAAATCAATGTTAACAACTTACATAACCATTCTCCACCTGAAAATAAATTAAATCAGCTTTTTAATGACTCGATTAATGAGGATTCAGTAATAACTGATAAAGAAGGACAGTCTTATCGTGGAGATTCTCCATCACCTTGTGTGTCATTAGTAAATGAATCTCTAAGGGAAGTTGAACTCCAAAAACAAAGAGACGACATAATTGCACATTCTATGAGCTTACAGATAGAGTTGGAGAAAAAAAATTCCTTGTTAGAGTCTCTCCAGGCGAATATTGATGAACTTGAAACGGCCCTCCAAGATCAAGCCTTATTGAAACATGAAAATGAAAACATAATTGAAAACAATGCGAGAATGTTGAAAACAATAGAAGTTCTGGAGGCAGAAAATATCTTATTGAGAGCCGAGAATAAATCTCTGAAAATTGAGACAGAAGAATTAAGAAACTTCTATTCGCCGGGTGACACTATAATTGATTCATCTTTCGAGTGTGGTGCAATAAGAGTAGAAAACTCTTTCAATGTTTTCAGCAAATCTGGAAAATTGGCTATGTATAATAAGGAAAATGAGAATATAGATGAAAATTATAGTAAAAGAAAATCATCTGCCCAAACTGACAAAACCCAAAATAAAAATAGGGTGATAAGACAGGATCAAGATGGTAGTAATGATGTGATCGAGAAAAACGGAAATAAAGTTGAGTCACATGTGATCCAGTGCACGGGCCACGTGTTGGGTGGCGATGACTGCGGCATAAAGAAGGAGACTGGTGAAGGGGTGGGGGGTCTGTGCTCGCAGCAATGCCTGGTGGCCATAGGGGAGCCCATCCCACATCCGGTCAACATTGAGACACCGCTCGGCCATCACACCTTCCTCAGCCAACACTCGCTCGACATGAAGTTCTCCTATGCTGATGACAAAATGGAAGAGTTTCTTGGCTACGAGTCGAAAGACTTGATGGGAAAATCAATCTTCGACTACTTTCATGCTCAAGACAGTCCTGCTGTTGAGAAAGCATTCAAGTCATTCCCTGACTGGAGCTTCACCTCGCCTGATATTATATTTGAGCCGTCAACTGGCTTCACTACTGTCACACTTCAGCGGGGACCGCCACTTGACGTGCTCATCCGGTAA
>NlTgo
ATGTTCAAATGGTTTCGGGAGTTATGCAACGATGTAAGTGAGAATGAGGGAGAGAAGATGAATGAAACTAGGAAGAAATCGGAGAAGAAGGACAAGGGAGTTTATCTGGCAATAGAGAGCAAGAAGAAGGGTGGAAGCAGATCTGATGAGGACGACCCCAGTGGTAGCAAGTATCCGCGAATGGAGGATGAAAGTTTACAAGACAAGGAGAGGTTCGCCAGCAGCAGAGAGAACCACTGCGAGATCGAGCGCCGGCGGAGAAACAAGATGACCGCCTACATCACAGAGCTGTCCGACATGGTTCCCACGTGCAGCGCCCTCGCGCGCAAACCCGACAAACTCACCATTCTGCGCATGGCTGTTGCGCATATGAAGGCACTCAGAGGCACGGGGAACACGAGTTCGGATGGTACGTATAAGCCTTCGTTCCTGACCGACCAGGAGCTGAAACACCTGATTCTGGAGGCAGCTGACGGCTTCCTGTTTGTAGTGCCCTGCGACACGGGCCGCATCATCTATGTCTCCGACTCTGTCAGTCCTGTGCTCAATCACTCCCAGGCGGAATGGTTCGGCTCGTGTATCTACGAGCACTTGCACCCTGAGGATGTGGAGAAGGTGCGCGAGCAGCTGTCCACGCAGGAGCCACAGAACTCGGGCCGCATACTCGACCTCAAAACAGGCACTGTCAAGAAGGAGGGCCATCAGTCGTCGATGCGGCTGTGCATGGGCTCTCGACGCGGCTTCATCTGCCGCATGAAGATCGGCCAGGTGGGTGCAGACAGCATGGTGGCCGGCCACCTGAACCGCCTCAAGCAGCGCAATTCGCTCGGCCCGGGACCCAGCCGCGACGGCCACAACTACGCCGTCATCCACTGCACCGGATACATCAAGAACTGGCCGCCCACCGGTGTGCAAATGGAGCGTGCCGTGGAGGAGGATGGTTCACACTGTTGCTTGGTTGCCATTGGCCGGCTGCAGGTCACATCCACGCCCAACACAAGCGACCTATCCTCTTCTAACAATAATGCTGAGTTCATCTCGCGACACTCGATGGACGGCAAGTTCACGTTTGTGGACCAGCGCGTGATTGGCCTGCTCGGCTACGCGCCACCCGAGCTGCTCTCCAAGTCCTGCTTTGACTTCTTTCACCCCGAGGACCAGACGCACATGAAGGAGAGCTTCGAACAAGTGCTGAAACTGAAGGGGCAGGTGATGTCGGTGATGTACCGGTTCCGTGCCAAGAACCGCGAGTGGGTGTGGCTGCGTACTTCGGCCTTCGCCTTCCTCAACCCCTACACCGACGAGGTCGAGTATATTGTTTGCACCAACACCACTGCCAAGTCGTTGCACTCACCACCTGGGGGCGGCAGCCAAGACCATCCGCCTCCGCCGCCCCAGCCGCCTCCGCAGCACCACCCCCAGGAGACTGCCACCAACACGCCGCCGCATCAGGACGCCTATCAGCCAGGTGTGGACTACAGTGTAAGCCCCCAACAGGCGACCGGTCGCTACATGGGGGGCCCAGCCGCGGGGGCGCACAGGGGGGCTCAGCTATACGGGGGTGCGGCAGCAGGGGGCTACGAACCACCCCCGCCCGCCCCCTCGCCCATCTACGGGGGCAGCACCCAGTCGCCGCGTGCCGCCTCCAAGGGACCCACCACATCGCCGCAGCCTGCCTGGACGCTCAGACAGCCGGTGAGCGAGAGCGGAGCATACCAGCAGCAGCAACAGTATCAGCCGCCAGGAGGAGGTGGTGGGGGTGGGGTGAGCCCATCCAGGTCACCCACCTACACACAGCTGAGTGGGGCCACAGCCAGGCCTCCACCCACTCACCCACTCTACCACGCACAGCCACCGCCCGGCATGTGGTCATGGCAGGGCGCTAGTCAAACGGCAGACGGCGGGGCGGGAGGGCAGCAGGAGTTGTCCGACATGATGATGCAGATGCTCGACCACGGGGCGGCCACCTCCTTCGAGGATCTCAACATGTTCAACACCACTTTCGAGTGA
>NlCyc
GTTGTTATCAGTTCTCAACTTTCCTTGAGTTGTATTCTCGCAATGAGTATTATTACATATTTGAGAATAGCAGTTTTGAAATTGGTGTAGGAAGTTGAAGATGTTGGAAAACGAAGTGATAGGTTTAATACAAGCAATTCATTTTTACAGTGATGGCAGTGACTTCGATGATGACACAGGTGATGATTCAAAGTCTGTTCGAACTGATGACAACAAGAAGCAGAACCACAGTGAAATAGAGAAACGACGTCGGGACAAGATGAACACCTACATAACCGAGCTGTCAGCCATGGTGCCCATGTGCTACGCGATGTCTCGCAAGCTGGACAAATTGACAGTTCTGCGCATGGCAGTGCAGCACCTCAAGACCATCCGCGGCGCCGTCCAGTCCTACACCGAGGGCCACTACAAGCCCTCCTTCCTCTCCGACCAAGAGCTCAAGCATCTAATTCTTCAGGCAGCTGAGGGCTTCCTCTTCGTTGTTGGTTGTGACAGAGGCAGAATCTTGTACGTTTCAGAATCTGTCTCTCAAGTGCTGCATTATTCTCAGGGTGATCTGTTGGGCCAGAGTTGGTTCGATATTCTCCATCCGAAGGATGTGGCAAAAGTGAAGGAGCAGTTGTCCGCATCCGATCTCAGTCCACGTGAGCGACTCATAGATGCAAAGACAATGCTGCCAGTGAAGACAGACGTTCCACAAGGTGTGTCGCGGCTCTGTCCCGGCGCTCGGCGTTCGTTCTTCTGCCGCATGAAGTGCAAATCATCGAGTGGCGGAAGTGGTGGAGGTGGAGGCGGAGGCGGTGGTGGCGGTAGCATCAAGGAGGAACAGATAGACAGCAGTTCGTCGGGAGGCGGCTGCCATCGCAGAAAAAAGCAAACTCATGCCGACAAGAAACAGTTCAGCGTGGTACAGTGCACGGGTTACCTGAAGTCATGGGCTCCGACCAAGTCAGGAGGCATGGGCCAGGAGCAGGCAGCAGGCAGCAGCGAGTGTGAGGCAGAGAGTGAGGCAGACGGAGATGGATGCAACCTGTCCTGTCTGGTGGCCGTCGGTCGGCTGCTGCCCCCACTGCAGGTGAGGCATACCCCCTCGCATGCCCCGCCGCATGACTCATCGCCCAGTCGGCCCAAGCTGCGCACCATTCAGTTCATCAGTCGCCACGCCATGGATGGCAAGTTCCTCTTTGTTGACCAGCGGGCTACAATGGTACTTGGTTTCCTTCCTCAGGAGTTGCTTGGTACAAGTATGTACGAGTACTATCACCACGAAGACATATCGAGATTGGCCGACTCTCATAAAGCTGCTCTCCAAGGTCCACCAGCAATCACAACTCATATTTACAGGTTTCGAAGCAAGGATGGCTCGTTTGTTCAACTGCAGAGTGAATGGAAGTCATTTCGAAATCCATGGACAAAAGACGTTGAATATTTAGTGGCGAAGAACTCCCTTGTGATGAATGAAATCAAAATGCAGTCAGATGGACCGCGAGTACATTGTGAAGAAACTAGTCAACAGAACAGCTTCGATTTCTTCGCCAGTAGTCAGAATAATGGTGGTATTGGTGGCAGAGACATGTCGAGACTGATAAGCTCGCATGTGGAGGCGAGCAAAATAGGCAGGCAGATAGCAGAGGAGGTGTTCGACCTGCAGAGGCGGGGAGTCGACTCACCGTCCAGCCACGGCACTCCTTCGCCACAAACTGACCAGTCACTGTCAGTCGATTCGCAGTCGAATAATGGTGCGAAACGGGAAAGGACACACCGCAACAGCAGCTGTAATAACAACAATAACTACGACTCATCCTATGAATCAGTCAGAAATAATGTGATCTTATCCAGTGCAGCTGCTGAGCCAGAAGCTGAAGTGGCAGATTTCGGGTTGCGAGTGTCGCCGGCTTGTGAGCAGACGGAGGCGGGGGTGACGACCGAGGGTGCGGATGGCAACGACGAGATGGCAATGGCGGTCATTATGAGCCTCTTGGAAGCCGATGCCGGCCTGGGGGGACCTGTCGACTTCTCCGGCTTTCCTTGGCCGCTACCCTAGAGTAGCCGCCCACTTCACTACCGTACATTAGTCTTACGAAATAAGTGCTGTGTTATAGATACTATTTTTTGTTTTGTACTCGTATTTATGTCGTTTTTTCACCATGATCGTGTTATGTCGTTGACTCTTGTGGAGCTCACAGTCGTTATAATTATATAGTTGGATCTTGTAATGAAGTATTTCAATAGGGCTACTTGAATCGTTAATAAATTAATAATGGAATAATTTTTGACTTGAAAGCCGA
>NlMet
GTACTCGGCACTCAGTCAGCGGATAGACAGTGATCAGTGAGCAAGTGTGTAGTTTGTCGCTTATCAACGTGAATTCGCCAACTATCGGTTCCACTCCACAAATCCACCGGTTTTGTTGTCAAGTTATCACTTACAACACCATCAAACAGTCTTGTCAAGTTATCAGCTCCAACTCCATCAACCAGTGTTCATTCTACAAACTCAGTTGTTGCCCCGACATGTAGACGACGACATTCTCTGCCCGATCGTCTATAAGTTACAAACTCCTCCACTAACCATCCCTACAATGGTCGACTGTTGTCCTCAACAGACCCCGATGTACCACAACGGTCACACCTACACTCAGCAACAGGCCATCGCTCTGCAGCAATACTACCAACAACAACAGCAACAACACTACCACAACAACTACAGTCCCTCTTCGTCGAGCAGCTCGAGTAGCTCTCATGGCTACCCGTCGCCCCCTGACCAGGACTACCAGCGCCGCTTGAATGCCTACTGTGGCTTCAACAATGATCCCTTGAACAGGAACAACGGGTATGTGCCGCCCTACAACAACTATCAACTGGACAACAACCGGGTCTACGATCAGAGCCGCTATCAACAACAGCACATGCACCACCACATGTACCGGCAACATGGCCATGCATACTATCATGGTCACGATACTCAACTCACCAGCAGCAGTTCGAACCCGGTGCGCGAGTCGCGGAATAGGGCGGAGAAGAACCGGCGCGACAAGATGCTGCGTTCTGTGCACGAGCTGGGTCGCATTGTGCCCCTCGTGTCGCTGGCTTCGGCCGCCAACAAGCGCACTGACCGCACCGGCATACTCAGGCTCACCGCCTCATTCATACGCATCGAAACACAACTGAAGCCGGGACTTCTCAAGCTGCTGCAGCCCAATATTAAGAGCTTTGACTGGGAAAAGTTTCTGCTGGAGAGTCTGGAGTCAGTCTTGCTAGTGGTTTCTGGAAGTGGAAAGATTGTGTTCGTGTCTAACACTGTGAAAGATCTCCTTGGTCATGATCCGCTGGACATGTTGGGTCGTCAACTGACCGATTACACCCAGAAGAACGACTGCGATGAACTCAACAAACAGCTAAAGATCAATCCGGACGAAAACACTTCGGGCTACACGGCTGCAGAAGTGGCAGCGAGCGATGATTCGTCAGACTCGTCGTCACAGTGCAGCGGCGGGGGGGCATTGATGCGGCCACTGGCAGGCGCCCAGGCGGCCGGCCTCGAGGACGAGGTGTGTCTGCCGCGCTCCTTTTTGCTGCGCCTCAGTCGCGGACCCAAGCCACCCTCCAAGGCCGCCAAGAACGAGAAGCTCGACTATCAGCTGGTGCATGTCAACGGCCATCTGCGCCTCTCCACGCGGCCCGACCCTGCCGCCCGGCAGCTCGCCAAGCGCAACCGCACCCAACAACAATACACGGAGAACGACGTATTCCTTGTGGCGCTTGTGCGGCCGGTGAAGGAGCGCATCCTGACGTTGGGTGAGTTCAACGTGCGGGAGGAGTACATCACCCGGCACCACATCGACGGCCGCATCATCTACACCGATCACCGCATCTCGATGGTGGCCGGCTATCTGCCCGGCGAGGTCACTGGCATGCCCGGCTTCAAGTACATGCACAAGGATGACGTCATGTGGACCATGATTGCATTGCAACAGATGTTCTGTGGTGGTAAACGGATTGGAAACAGTTGTTACAAAATGCTAACAAAGAATGGAAAGTTCATCTTCATGAGAACACACGGCTATATCGAGTTGGCTGACGATGGGGAAACAATCCAATCATTTGTCTGCATAAACACGGTCGTATCGCAACAGGAGTTTGAAAAACTGAACAAAGAGATGAAAGAAAACTTTTCACCTGTTATGAATCAGAGGCGAAAAGAGATCTCCAATACTGAGCGGGGAAGGAAGGAAGCTACTCCGAACGTGGTGGAGCCGAACCCATTGGCGCCCGAGGTTGAGGACCCGGTTCAGCTGCAGAAGTACATCAAGAACCTGCTGGTTGAAGGCATTCCGTCGGTGCCGAGCACCCTTGACACGCCCGAGGACTGCAAGGAGATCGAGAACTTCATGAACGTGGTGACCAAGAACATCCCGCCGGTGTCCTACCTCAACCAGCAGATGAACCTGAATCCGCCGGTGGTGAAGGTGGTGAAGAGCGACGACAAGCAGAGCAGCCAGGGTCCGCCACCGCCACTGCCACCGCCCCCGCCTGCTGAGCCCATCAACCAAAGCGTCACCATCAAAATGCAGCAGCAGCGGCCGTCTGTGCTCAGGAGGATCGTTAGCACCAGGGAGCCGACGACCTCCTACGAGGGATGTTCAGTGAGCAAGCGCATGCGCACAGAGGTGCCAGTGCAGGAGACGCGCGCCACAGTGCTGTGCCAGACACCAAAGCCACCCCCCTCCCCTCAGCTCGCCCCTGCCTCTACCACCGCACCGCCCTTGCCGATCTTGCCGCCCCTTTCGCCACCCATGGACTACGCGGGGGCGGACAGCGCCGACCTCAAGCTATTCCTGAACGCCGCCGCCTCCGACTACCCGTGTCCCTTCGAGGAGGCCACCAGCCTCGGCGAGTTGGTCGCCACCGAGCCACCCTGGCTGCACACGCCCACCAACCAAGAGTACGAGGCTTTGCAGCTTGTTGAGGGTCTGACCAAGACTCAGTCCCATTTGGAGCTGCGCTTGCAAAGGCAGACACAGTCTCTGACTGAAATCACCGAAAATCTCGACATGATTCAGCCAAGTGACCTGGATGACAGCGACATCTCCACTATAGCTCGGCTCAGAGATCTCACTGAAACAACCACTCAGCAACTTTCAGAACAGGAAGTTACTCTGAGAGATCTGCAGAGGGATACTCAGCACATATTCCTCGAAGGTCACAACTACCCAGTCAGAGCCGATGCCGGAGATCTCCAATTCTTAAACAATGTAGATGACAAGTACCTGTAACTCCTCAACCTTTTTTATCACGTTTGTTTCAGTTGCTATATTTAGTTGTTTCCTTAGTATGTTGTTTTAGCACTGTAGTGGGTTACATCCCAGATTCAGTTGATATTTTACAATTGCTTTACCATTGGAACGAGAATAATTGTCGTGGCTCAACATTGTGAGGAACCTGAGTTGTTAGACGACATTTCTGTTGAAATTATTATTACTTTCGATTTGCAAAAATCATTGTTAAACTAAAACTTTTTACCAATTCCAGCTTTAAGAACATCAGTTTTAGGTGAATTAATATTTAGGACTCACTGTTTTCAATGTACTGTACTTGAAAACACTAATTATTTGTTTAATAATGTGCTCACTAATCTATGGTCTATGGTCTGAATTGCGACTGAAGCTTCAATGAATCAATAACAGTGATAGAAATATAGTGCAATATTTTTCGAGTGAAGTAAACTATTCAGAATCCTTCTAGTCAACATATTTAGACTCTCCCTA
>NlEmc
ATGAAGGCAGTCGCGAACCCAGTGTACCCCACCAACCAAACCGTGTCAACGGGTCGCGTCCAGCGTCCCCGACATCGCGATATCGAGAACGAGGAAATCCAAATGTACATCTCCAAGTTGAAAGAACTCGTTCCATTCATGCCGAAAAACCGCCGTCTCTCCAAGTTGGAAGTGATACAGTACGTGATTGATTACATTTGTGACTTGCAGTACGCTCTGGAATCCCATCCAACTGTGGTCCAGGACGCCGCCGCAGCCATCATCAGGAACTCCGCAGCCGGTGGATTGACGACATCCTCGCCGACCACCCCCGCCACTCCCCGGCAGCCCCTTGGAGTCCTGGCGCCCAACACCATCCTCGCAGCGGCGTCGTCGTGTTCCACGCAGGAAGCCTCAACGGTTAGTTAA
>NlHey
ATGGTGGCACGAGTCACGACACACGAAGGAGTGGCTGGCACGTGGCTGCCAAGGACGGCCAGAAAAGAAGACGAAGATGGTATGGTTGAGAAGTTGGGCAAGCCCACCGCTGCCTCCGACCCACTTCACTGGAGCAGCTATGCTGCTCCCTGGCCCACTCCGCCGCCGCCGCCTCCTCGTCATCCTGGAGGCGGTATGTTGCATCACCAGCAGCCGCCCCCGGCTAAGAGGGCTCTCTCAGAAAGTGACGACTGCGACGACGCCTTTTCCGAGGAGTCGTCCAAGGACCAATGTCCATCGCCGGGTGAAGCGGACAGCTGTCAGATGCTGAGCCGCAAGAAGCGACGCGGCATAATCGAGAAGCGGCGGAGAGACCGCATCAACAACAGCCTGCTGGAGTTGCGACGCCTCGTGCCCTCCGCCTACGAGAAGCAGGGCTCTGCCAAACTGGAGAAGGCCGAAATACTCCAACTCACCGTTGACCATCTCAAGGTGCTACATTCCAAAGGTCTAGATGCACTGGCCTACGATCCATCCAAGTTTGCAATGGACTACCACAACATCGGCTTCAGAGAGTGCGCAGCCGAAGTTGCCCGCTACCTGGTGACGGTGGAGGGACTCGACATCCAGGATCCTTTGAGGCTGCGCCTGATGTCACATCTGCAGTGCTTCGCCGCGCAGAGGGAGTTGGCAAGCAAGCAGTCTGCATGGTACCCGCCGCACGGCCAGGCGGTCACGCCGGCAGGACATCAGCATCAGCAACAGCAACAGCAACATCATCAGAATAATTCGAATCAGCATCAGAATCAGCACCAAAGTCAGTTGGATTCGACAGGGAACTCGTCGTTTGACACATCCTGCGAAACAGCAGCATCCTCGCCGTCAACGCCTTCAGCGATTCCCCCCGTCTCCTCCTCTCAAACCACCCTCACCCCCCTCACACCCGTATCCATGTCCTCGTCGGCGTCGAACGCTCTCTACCAACACCATTCCACCAGCAATCATCACCAGGAACAAACCCCTCCCTACCACCAAACTCATCATCATCATCATCCCCATCAACCCTCCGGCTATCACCAGAATCCCAACGACATATCCCACCAAAACTACTCCCCTCATCATCCCAATTCCAACCAGGTTTCCTCTCAGATGAAACCCTACAGACCGTGGGGCGCCGAGGTCGCTTATTAA
>NlStich1
ATGGGTAGTGATGATGAGGAGTGTGATTGGGTGTTTTTGGAAGCTATTTTTGAAAGTCACGACCCGATGTCGCACCGGATAATCGAGAAGCGTCGCCGCGACCGCATGAACAACTGCCTGGCCGATCTGTCGCGCCTCATCCCGGCCGACTACCTGAAGAAGGGTCGCGGCCGCATCGAGAAGACTGAAATCATTGAAATGGCCATCAAGCACATGAAGTATCTGCAGGCCCACTTCTGCAGTCACATCGGCGCTTCGGAAGGCTTCACCCCGGACCGCCGGCCCTCTTCACCACACCCCCACTGCGAGGAGTCGATGTCTTCCCCTCCCACCTCGGAGGAACCCCTTGCTCCCCCCCTGGCCAAGCCGAGCGAGCACTACCGCCTGGGGTTCCACGAGTGCCTCACTGAGACTATGCACTTCCTGGTCGAAGTCGAGGGATATTACTCGGGAGATGCACTGTGTGTCTCACTTATCAGCCATCTACAGAAGCATTGTGATTCTATCATCAAAAGCGACCGTTTGAGCAGCCTGAACCACTTACCACCAGCTAGCTCCTCGACCGCCTCCAACTGTGGAGAGTCGGTCAGCACCTCCTCACCTAGCTCTGCCTCTGGGGTCGGAGGAGGTGAAGGAGTAGGAGGAGGAGCAGGAGGAGGAGTAACCAAGATGGCGGCCGAACACCATCACCACAATGGCGGCTCTAGTTCTAGCAGTGAAGCAGGCCGCAGTGGCGATGACCTCCACATGCTCTATGAGAACCAAAATGGCGGCGGCAGCAGTCAGCTGAGGGATATCCTCACCAGTCCAAACAGCAATCACTCCATGGCTAGTCGACTACAGTTACTGATTTCTAATGGTAATAAAAATCTTCATGAGGACTCAACCAACGTTATACGTGCTTGTACTGATAAAATCGATAATACCTGTGCTACCCTGGCGGAACAAGCTGACCTGATTAAGAAACAACAATCCACTATCGATGAACTCACTGTAGAAAATGAAAAACTGCGTAAGAGGGTGCATGCGGTTACTAGTCAGATGGGGGAGGTTACTGATCAGATGGATGACATGCAACAATACTCCAGACGTAACACCGTCGAAATATACAGAATTCCATCGGCACCCAATGAGGACGTTGCGGATATTGATTCTTTATTGATTCTTTATCACAAATGA
>NlSide
ATGGAAAAAAGGAGAAGAGCACGCATCAATCAATCTCTAGCACTCCTGAAAACTCTCATATTGGACTCTGCCAAGTCTGAGAATACTAAACATTCGAAGTTGGAAAAAGCAGATATCTTGGAGCTGACAGTGAGACACCTTCAAAGACAGAAGACATTAGGGTCGGCTGTTCTTGACAAGTACAGAGCAGGATACCAGGAGTGTGCGAAAGAGGTTACAAGATTCCTGGACACGCCTGAGCTACACCTGGGTGTGACTCCGAACCTTAGCATAAAGCCGGGCTCACCGCACCAGCTGATAGACCCGACAATGAAGCAGCGACTGCTGCGGCACCTGGAGAGCTGCGTGTCCGAGATCGACCTGGACTTCAGCCTGGCGGCGGTCAAGTCGGGCCTGACCGACGCCATCGACAACCGACTGGAGGACATGCTGATGGCCGTCAAACAGGAGCCGCTCGACTGCGACGACATGACGAGCCCCGCCAAGCCGGACAGCAGCACCGTTTCGCCCGGCGACGAGAACAACAACAGCGCCGGCGCCGCCAAGAACCACAAGCGACGCTCCAGCGGCGCGCGCAGTCGAAAGTCCAGCAACCCCGAGAAGAAGCCACTGGTCACCTCCACCAAGGCCACCAAAGCCATGGACGTCGCCACCGACTTCTCCTCCTCGCCAGCCACGCAAGCCAGTACCTCCAGTCAAGTGTCTGTCGTACAGGTGATACCTTCACGATTGCCCGACGGCCAAGTGGTGTTCCTGCTGCCCAGTCACTACGTGCAGGTGTCCGGCCAGGAGTCAGGTCTGGCGGACACCAGTGGACACCGCGGCGGTGACGAGGACGCCAACATGCCCGAGCAAGACGCCCCACTCGACTTCAGTGTGCGTTCGAGCAAGGATACCAACACGCCCGACTGGGCCACCGAGATGTCACCTCTCACCACCCCCGCTCTAACCACCCCTCTCTCTCCTGCCGACAAGGACGAAGATGTCTGGCGACCTTGGTAG
>NlDpn
ATGAGAACACAACTAACTGAAATCATGATGTTTCAGCCTGCAAGACACTCAAAACTCGAGAAAGCAGACATCCTGGAGATGACTGTCAAACACCTCCAAGACGTTCAGAAGCGACAGCTGTCGACGGCCATGATTGCTGACCCAGCAGTTCTGCGCAAGTTCCGCGGTGGCTTTGAGGAGTGTGCCAGTGAGGTCAGCAACTACATTGATAGTCTTGAGGGAATCAGCCCTGGAGTGCGTAGACGACTGGCAGCACATCTGTCATCATGTGTTTCCAACATTCCAGCCACCAGGAGCGAGGACACAAATAACAACAACAACAACAACAATGTTAATTCAGTCTCAGCAAGTTTGCGACTCATCCCAAGCCGGCTACCCAATGGTGAACTGGCATTATTGGTGCCCGATGCACAATCACTACCTGGAAACGTTCTGCCATTCTTCCAGCTGGCTGAGCATTGCACAAAAGTGGGTCAAGGTCACCAGGATACAAATATGGCTCCCAACGTACAACACTTTGATTCAAAAATGGCACCCAGTGTGGGACACTATGATACCAAAATGATGCCAAATGTGGGACACTACAATACTAAAATGCTGGACCTCAACACGAATATGGGGCTGCATCAACACTGCGGTTTGAACCAGGTGTCGACAACGTCCTCTGAAAAACTTCCTGACACTCTCCGGCTGGACTCACATCCCAGTGCATTCACAGCAGTCAACAAGCATGCCTCAGAACGCACCACAAGTCCAACATCATCACTTGTGTCTCCTGTGTCATCGAGCAGTGCTGAGAGGCAAGCAACCATGCCACATCACCCAAACATCAACAACATGTCCCCAGAAGTGTCATCCACATCTGAGCAGCTGACTGAAAGTGGTCCAGATCCTTCATCATCATCCTTCAACTCATCAACATCATCAAATTTGTCTCCTCAAAACAATCAGCCTCAACCATCTACTGAAACATCTCCCAAGCTTGAAGGCATACCTCAGGACAAACATACCTTCCACTACACACATCAGGATAACAGGGTACCAGAACCATCTACCCTCATGAAAATTTTGTCTACCAAAACCATCATTGATCACAATGATGTCAGCCACAATCCTTCCCAAAAACATCAGGATGTGCCCAAATTCTCCTACCCAGATTTCCCCAAGAATGTTGCTGATGATGTTAGCAGGTTTAGTAGTAGTCAGGCACAAGATAGCGTAAAATCAAGGCCACCTCAGACAGAGTACACCTACATGGATGCACTGAGAATTCATGAACCTTTCGGTAGGCAACAAGAGGGAAGGTATGGGAAGAGACCAATGAATGACCCCAATGTGATGTCCGAATTCAGTCTGCCTCTTACCATAGACACAAATCTAAATAGAGGTGCCAGTAGGAGATTGACAGGAAATGTCAGCGACAGTGATTGTTTGCCAACACCTATCAACTTTTCCAAAAACGTCACACCAATGTTCCAGAATGGTTTTGTGCCTAGTTTGAAGAGGAGACGTTTGGAGGTCAGTGCCAACTTTGGCAGGAATGGTAGTAGCGGTGAGGCTGAACTTCTGTACAGAAATGGTAGTAGCAGTGAGCCAGTGGGCCAGAAAGAGGTGCAGTCATTCTCACCACAGATTATTCAGCAAAAGAGGAGCAGTGCTGAGGATGTGGTTCAAAATGGTGGCTCTGAAGAAGCTAGTGGTAAGGAGAACATGTGGAGGCCCTGGTAG
>NlH
ATGGAGAAGAAAAGAAGAGCGAGGATCAACAACTGTTTGAACGAGCTGAAAGCGCTGATTCTGGACGCCATGCAGAAAGACCCAGCCCGCCATTCCAAACTGGAGAAAGCGGACATCCTTGAGATGACTGTAAAACACCTGGAAACCATCCAACGCCAGCAGTCAACCATGACCACCATCACAGATCCCCACGTCCTCAACAAATTCCGGGCTGGATTCAGCGAATGTGCCGGAGAAGTGGGGAGGTTCCCAGGTTTGGAGCCTCCAGTGCGTCGACGACTCCTTCAACATCTCACCAACGTGCTCAACACATCCACAGGAAACGAGGGAACATCTGCTATTCAGGGAAATCCTGTGAATCCTACAGGAAATTCATCGAATCCTGCAACAGTTGCCAGTCAGGGAAATCCTGCAGGAGCCACATCTGCTGCAACCATACCCGGTCTTCAGGTACATATCCTTCCAGCAGTGACCAATGAAGGTGCCACAACACCCTTGGTCACCCAGCAGAGCATACTTTTCAGCACCACAGGGAATGGTGCAAGTCTACAGCTAGTCCCCACAAGACTACCCAACGGGGACATTGCTCTTGTGCTACCTTCAAACCAACCCAACCATCAGAGCCAGTTGAATATCAATGTGAGTACTAGTAACACAGTAAGTTCTGCAAAGGTTGTTACTGGGAGTTCCAGGACAACTGTGGGAGCTGTTACTGTTCCTTGTACTGTTGTGCCTGGTGCTTTGTCAACGTTACCAATGTTGATACCAATCACAAGGAACAGTTCCCAACCGAATGGAACAGGTTCTACAATTGTTCCATCAAGTACTGTTTCAACATCTTCAGTTCCATCTTCCACACCATTAGTTTCTCAAGCTTCTTCCACCACTATTCCACCAAGACCATCTTCTGTTCCCTCTTCAAGCTCTGCTCCTGAAACCAACAACTCAAATGCGGCAAGAGTTGTGTCATCAGATGATGAGAATATCTCTGTAACATCAACAGTGTCCTCACCTCCAAACAATGAATCATCAAGTTCCTTACTTGGAAGCAATCGAATTACTTCTCCCAGGTCCTCCACCGCTGTTTCAATGAATGCCTCAAATGTAGAACAATTCATTGGAGAGAACATGGTGTCAAATAATTGTGCACCAAGGAATCAAGTAATTGGTGGAAAGTTTCTTGGAGAAACTGCTAATTCCACAAATTTTTCTACAAGAGGTTGTCAGAATATAGGTTTTAATGGAGGAAATATAGTGGGTTCTTCAGTTCCACCAAGAACCTTGCAAAGTGGGGGAACTTTTATGCAAGAGGATGCAAGTCATGGTACTATTTCACCAAATAATTCAGAGAATTTTTCTGGAGAAAACACAAATGCTATTGGCTCTACACAGAGAAACCCTGTAGTGAATTTCACTGGGGAGAACACAACTTCCAGAAACAGTACATCAGGAGTTACACCGAGTTTTTCTGTGGAAAACAGGATCCCTAGTAATAGTACACCAGGAACTACAGAAAATGGTGTTAATTTTGCTGGAGATACAGCAATCTCAACAAACTTCACACCAAGTAATCCTTTCTCAATCAATAACAGACTGCATAAAGAGGAACAAGATACCATTTGTAGGGATATCACACCACAGAACCATCCTCCGAACCTCAGATTTACTGAGGAAAGACTGATTCATCTCCCTAATACATCATCATCTCTTCCATCCCTTGTTTCTCCAGTATCTTCCTTTGCAGGCTCTGTGAGTCCATTGTTGAGGCACTATCCCCAAAACCACAGATTGCCAATTGCGGATGTATCAAGTTCTATTGGTCCAGGATTTAGGCAATCCCAGAGAGTATCGAATATAGATACAGTTCCTCTAGTGAGTCCAGAATTGAGGCAACCTCACAAAGCACCAAATAAGGGTATAGTTCCTCTGGTGAGTCCAGAACTGAGGCAACCTCACAGAGTACCAAATATGGATTTAGTTTCTGTAGAAAGTCCAGAACTGAGGCAAATTTACAAAGTACCAAATATGGATGTAGGTTCCCCAATGAGTTCAGAATTGAGGCATTCCCATAGTGTACCAAACACAGATGTAATATCTCTAGTGAGCCCAGAATTAAGGCAACCCCATAGAGTAGCAAATACGGATCAAGTTTCCTTAATGAGTACAGAACTGAGGTACCCTCAACAATCCCATAGATTACCAAGTAGGGATATGTTCTTTCATGAACAACAAGACCAAGCTATGAAAATTGATATGGGGGAACAGCAACTGAGGAACAATAATTCTTTGTTACAAATTGCTCCAGCACATGTATTCCAAAGTAGGTTCAATGGAACACAAGGTACTGGTCTGGGAGTTGATCAGAATAGAGGTTATGTGAGTCCACCTATGACGAGGCCTCTGTGTCTGGTGAAGAAGATAGATGATGAAGAGATGGAGGATGATATGCCTTGGAGACCTTGGTAG
>NlE(spl)1
ATGTCTTCTGAAATGGAACAACTTCAACCCATCTCAAGGACTTACCAATACAGAAAGGTGATGAAGCCAATGCTTGAACGGAAGCGACGCGCCCGCATCAACCGCTGCCTGGACGAGCTGAAGGAGCTGATGGTGTCAGCACTGCAGGCCGAGGGAGAGAACCACTGCAGGCCGAGGGAGAGAACGTCAGCAAGCTGGAGAAGGCTGACATCCTCGAGCTCACCGTCAGGCACCTGCACAAACCTGCACAAGCTGCGCAAGCAGCAGCGGCTGTCAATCAGCCCCGTCACCGAGGCCGACCGCTTCCGCGCCGGATTCACGCACTGTGCCACCGAGGTGTCTCGCTGCCTGGCCGCCACACCCGGCGTCGACGTCCACCTCGGCACCAAGCTGATGACCCACCTTGGCCACCGCCTCAATGACATGGACCGCCTCTCGCCGCTCTCGGTCCGCGTCCAGGAGTCGTCCGCCCCCCCTTCCCCAGCGTCACCAGCATCCACAGCCTCCTACACCATGCCGCTGACCCCCGCCTCCTCGTCCTCCTCCAGCCACGACTCAGATTACCTGCCTGAGAGCACTCATCATCAGTTACAGCAGCATTCCGGACTCCTTCTCAAGGTCGCCGATGACATGCACAGCAAATCCACGAAAATCTCTGAGCCAGTCTGGAGGCCGTGGTAG
>NlE(spl)2
ATGAGACCCGACACCCGCCCCCCGGGCGGCTACATTGCTGCCGCCGCCTCCACCGACTATGACGATCAGCCCATCTCCCGGACATACCAGTATAGAAAGGTGATGAAGCCAATGCTGGAACGGAAGCGACGCGCCCGCATCAACCGCTGCCTGGACGAGCTGAAGGAGCTGATGGTGTCAGCACTGCAGGCCGAGGGAGAGAACGTCAGCAAGCTGGAGAAGGCTGACATCCTCGAGCTCACCGTCAGGCACCTGCATAAGCTGCGCAGGCATCACGCCCTGGTTGTGCCGGCGGCTGGCTCCGGCTACGCGGACCGCTTTCGGGCCGGCTTCACTCACTGTGCCACCGAAGTGTCGCAGTATCTGGCGTCAGCCATGCAGGCACCTGAGCCCGTCATCGACCCCACGTCGGGGGTGAAGCTGCTGCAGCACCTGGGCACCTGCATCCGACAGATCGACACCGAGACTCTCCCGCGCCGCCCTGACGACGAGAGCCTCTACACCACGCCCCCCTCTTCGCCCTCCACACACATCCTCGCCGCGCACCCGGAGAGCAGCTCGGCCGTGTGGAGGCCCTGGGAATGTACCTACAAAGGTGATCGATTGGTCAAGCGCGGCCGTGACGGAGTAGCCTTCCCACGGGATGAATCAGCCGGCAGCCGGGAGTGTGCGCTAGCGTGGGACCCTCAGTCAGCAGTCAGCAGCGAGCTGCTTTGCTCAGCAATCGATTGGAGAAGGTTGCAGAGTGGAGATGACTCCTGCTCGCGAAGACGCTCCGCGCCCCGCTGA
>NlE(spl)3
ATGGGGGAAAGCGACGAGGATTACTGTGATGACGAGTTTCCCCAACCAATCCAGTCAGAGTACAGTTTTCCCAATAGAATGCAGAATAGCTATCAGCATACTATGACCAAGGCGGAGTTGAGAAGGAGCACTAAACCTATAATGGAGAAACGGAGACGGGCACGTATCAACAGATGCCTCAATGAACTCAAATCGCTAATTTTGGACGCCATGAAAAAAGACGTGAGTTGA
>NlKn(col)1
ATGTTTGTACATAACAACTCAAAACACGGCCGAAGAGCGAAAAGACTTGATCCCTCAGATGGCCTGTACCCACCTCTACCTGTGGCGACACCCTGTATAAAAGCGATAAGCCCCAGCGAAGGATGGACGAGTGGTGGTTCCACGGTTATCATCATTGGGGACAACTTCTTCGACGGTCTACAAGTTGTTTTTGGCACCATGCTTGTTTGGAGTGAGTTAATTACATCACATGCGATCAGAGTACAAACACCGCCGCGACACATACCTGGTGTTGTGGAAGTGACCTTATCCTACAAGTCGAAACAGTTTTGCAAAGGAGCTCCTGGTCGATTTGTCTATGTCTCCCTGAACGAGCCAACGATAGACTACGGCTTTCAAAGGTTACAAAAACTCATACCCCGGCATCCTGGCGATCCCGAAAAGTTACCAAAGCCAATTCGCAAAACGCCGTACAAAATGCGAGCAAGCAGCCCGCTCAACACGGAAATGCAAAGCACTCTCTATACACAAACAAAACAGCAAGGTCAGTTCTGCACGCGTGTGTGTGCTTGGGCGTACGAGTGCTCACCAAGGGTGTGTTGTGTTAGAGTGTGA
>NlKn(col)2
TTGCAGGTTGTGATATCAACGCAGGTGAGCGTAGAGGGACCTCTATTAGCCGTATCCGACAACATGTTTGTACATAACAACTCAAAACACGGGCGGAGAGCGAAAAGACTTGATCCCTCAGATGGCCTGTACCCACCTCTACCTGTGGCGACACCCTGTATAAAAGCGATAAGCCCCAGCGAAGGATGGACGAGTGGTGGTTCCACGGTTATCATCATTGGAGACAACTTCTTCGACGGTCTACAAGTTGTTTTCGGCACTATGCTTGTTTGGAGTGAGTTAATTACATCACATGCGATCAGAGTACAAACACCGCCGCGACACATACCTGGTGTTGTGGAAGTGACCTTATCCTACAAGTCGAAACAGTTTTGCAAAGGAGCTCCTGGTCGATTTGTCTATGTCTCCCTGAACGAGCCAACGATAGACTACGGCTTTCAAAGGTTACAAAAACTCATACCCCGGCATCCTGGCGATCCCGAAAAGTTACCAAAGGAAATAATCCTGAAACGAGCCGCCGACTTGGCGGAGGCACTGTACAGTATGCCGCGTAACAATCAGCTGTCGTTAGGGGCGCCTCGCTCGCCGCCGTCGGGCATTGCCAATCAGGGCATGTCAGCTGGCTTCAACACATACACCGGGCAGCTGGCTGTCAGTGTACAGGAGAATGGAACGGGCCAGTGGGGTGAAGAAGACTACAACCGTGGCCAGAGTTCAAGCGTGTCCCCGCGTGCGGGAGCCGGTTACGGCTCGTCGGCCTCCACTCCACACTCGTCCAACGGGGGCGGCGGAGGTGGAGGAGGCGGTAACCCAGGCGGTGGGGCGGCAAGTGGCGGCAACTACACCACTATGAACGGAGGCGGCAACTATAGTACAGGGGGAACCGCCCCCCCACCACCGCCGGTCAGCTCGCAGCTAACCAACATGGGGTCGCCGGGCCTGTTCAATTCGTCATCTAGAGTGGGTAGCCTGGTGTCGTCGCCGTTCGCGACCATGAACCCGTTCGCACTGCCGACGTGCAATTCGCAGTCGGCTGCGGCCGCGTACGGCGCCAGTCCACTGGTCGGGTCTTCCAAATAA
